# Supplementary material for: Understanding tumour growth variability in breast cancer xenograft models identifies PARP inhibition resistance biomarkers
Source: PubMed Central journal article supplement — NPJ Precis Oncol. 2024 Nov 18;8:266. doi: 10.1038/s41698-024-00702-x (PMC11574300; doi:10.1038/s41698-024-00702-x), 2024-11-18
Supplement: 41698_2024_702_MOESM1_ESM.pdf [file 41698_2024_702_MOESM1_ESM.pdf]

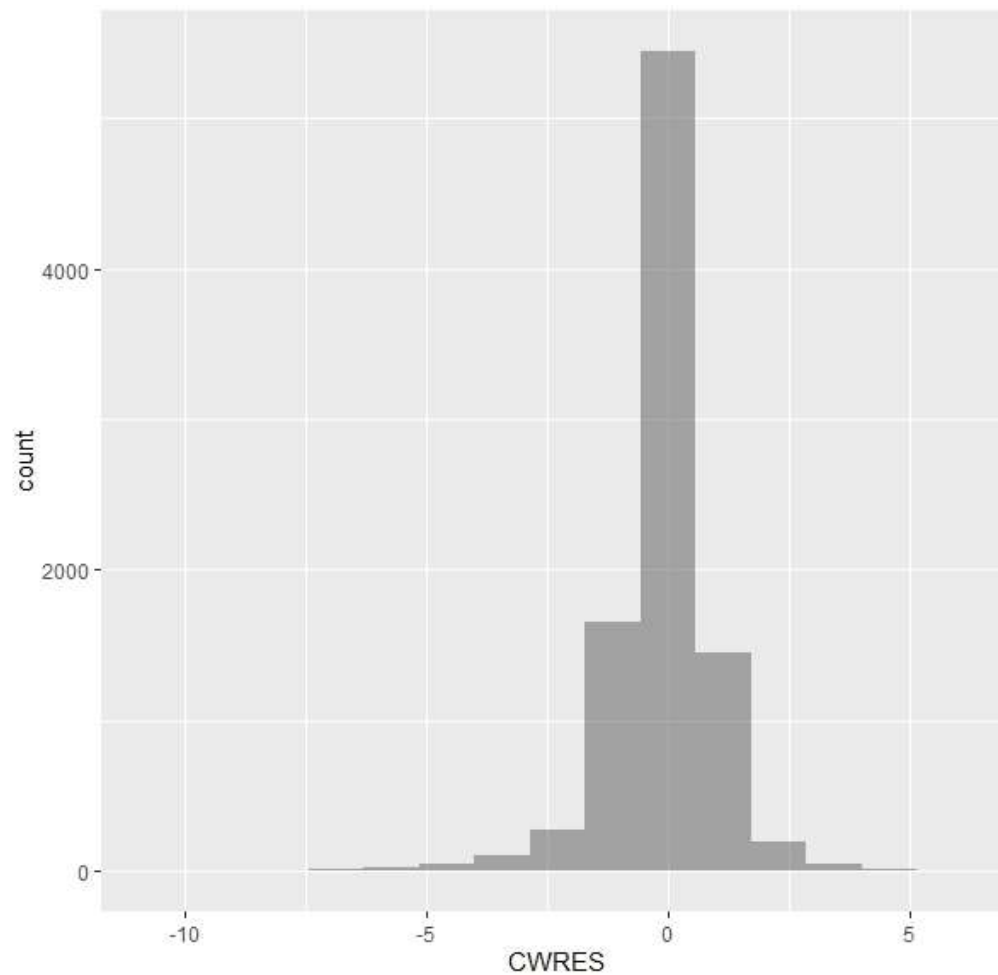

**Supplementary Figure 1.** Conditional weighted residuals (CWRES). Conditional weighted residuals density for olaparib monotherapy fitting. The assumption for the residuals in the nonlinear mixed effects framework is normality and the residual plots must resemble a normal distribution.

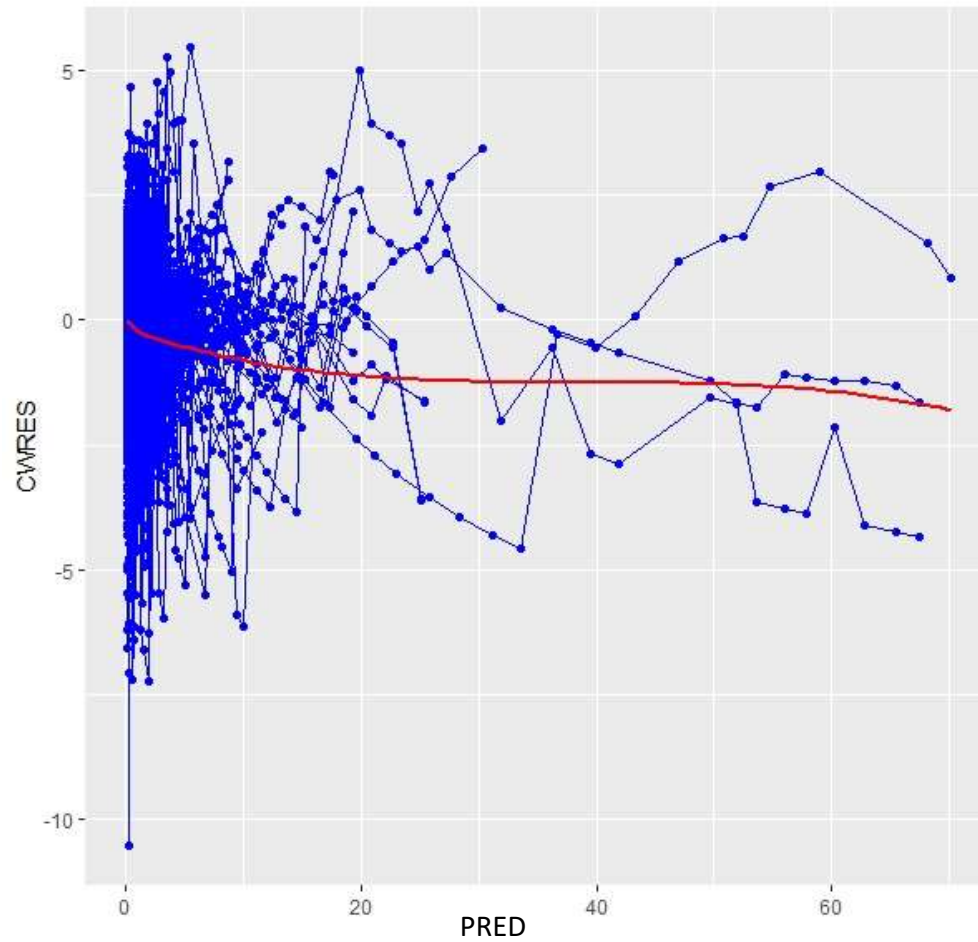

**Supplementary Figure 2.** Conditional weighted residuals vs population predication (PRED). Conditional weighted residuals versus predicted tumour volume for the olaparib monotherapy resistance model. The residual must be centred around zero and show no visible trend in order to satisfy the assumptions made by the NLME framework. That is satisfied initial with a trend developing at later times due to drop out.

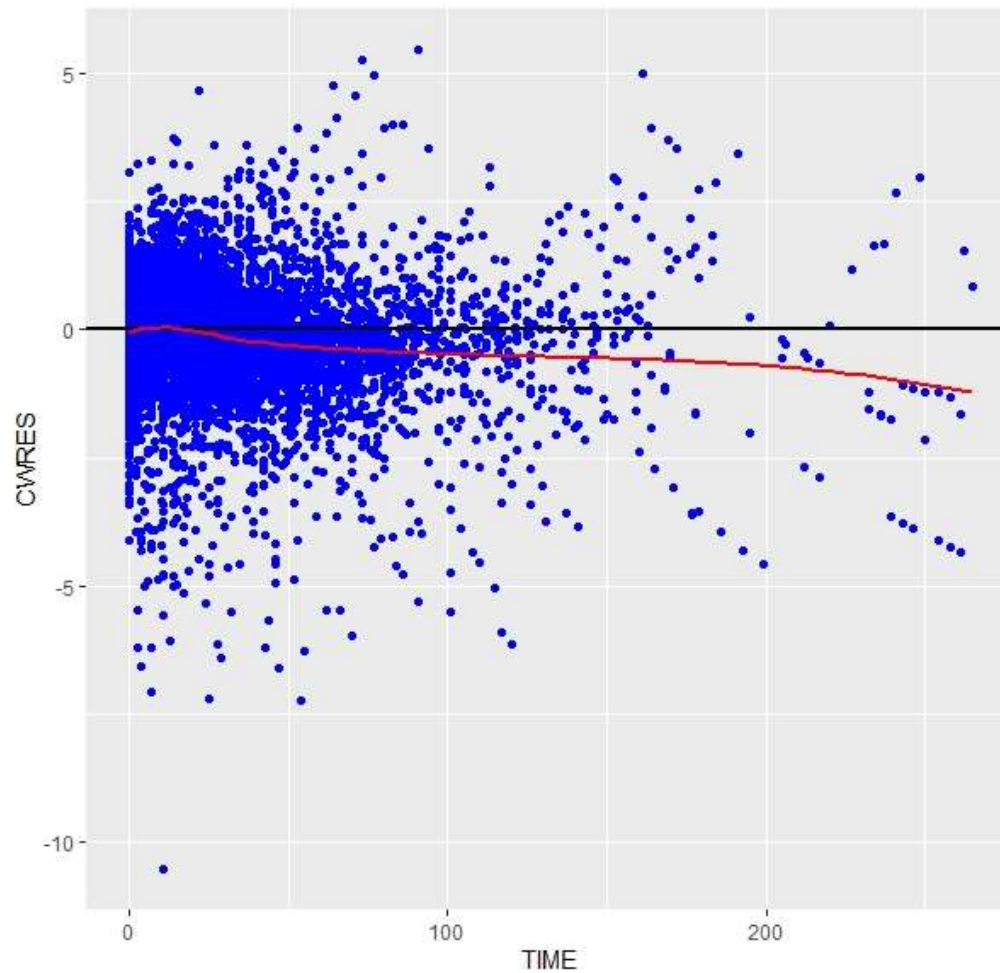

**Supplementary Figure 3.** Conditional weighted residuals vs time. Conditional weighted residuals versus time for the olaparib monotherapy resistance model. The residual must be centred around zero and show no visible trend in order to satisfy the assumptions made by the NLME framework. That is satisfied initially the fitting apparently becomes progressively worse for higher tumour volumes and later time points but this is attributed to drop-out, which is the removal of mice from the study when the tumour has grown above the welfare limit .

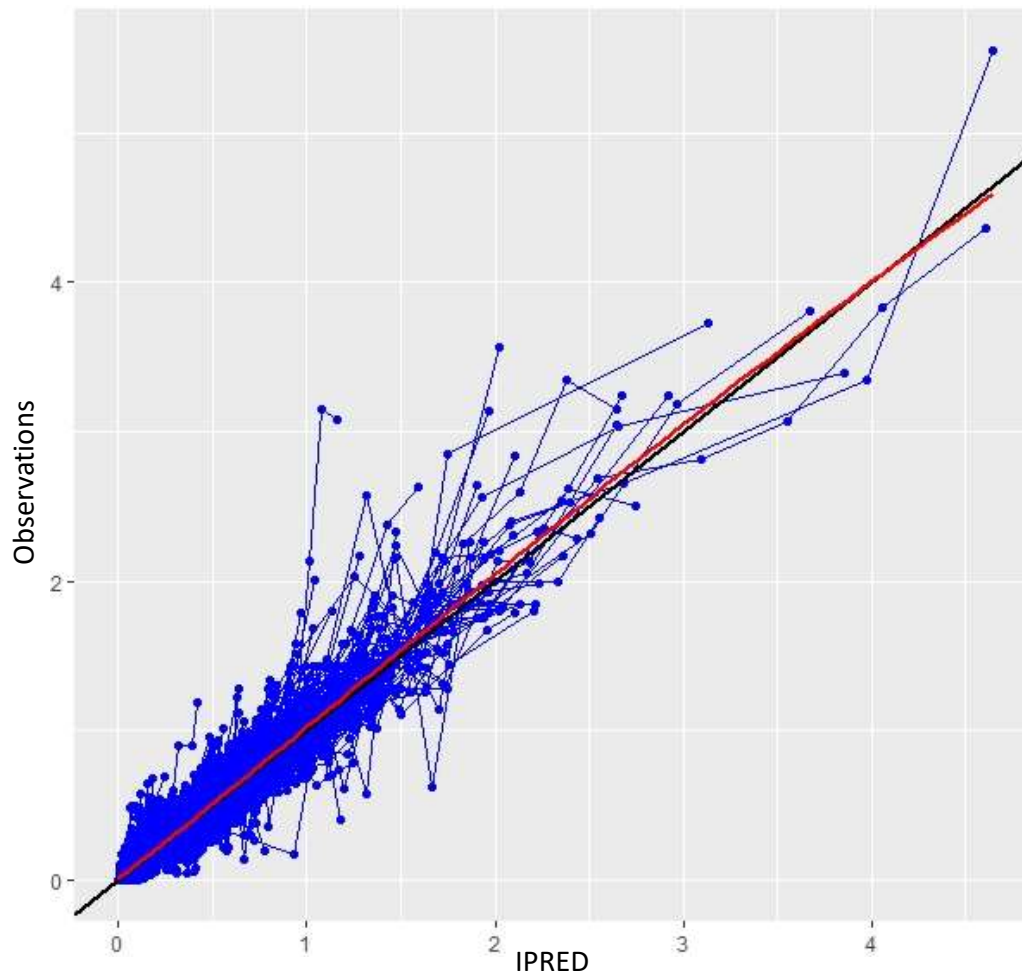

**Supplementary Figure 4.** Observations vs individual predictions (IPRED). Tumour volume data (observations) versus predicted values for each individual for the olaparib monotherapy resistance model. The black solid line represents the unity line and hence the agreement between the data and the volumes simulated from the models taking into account the residuals and variability of the parameters.

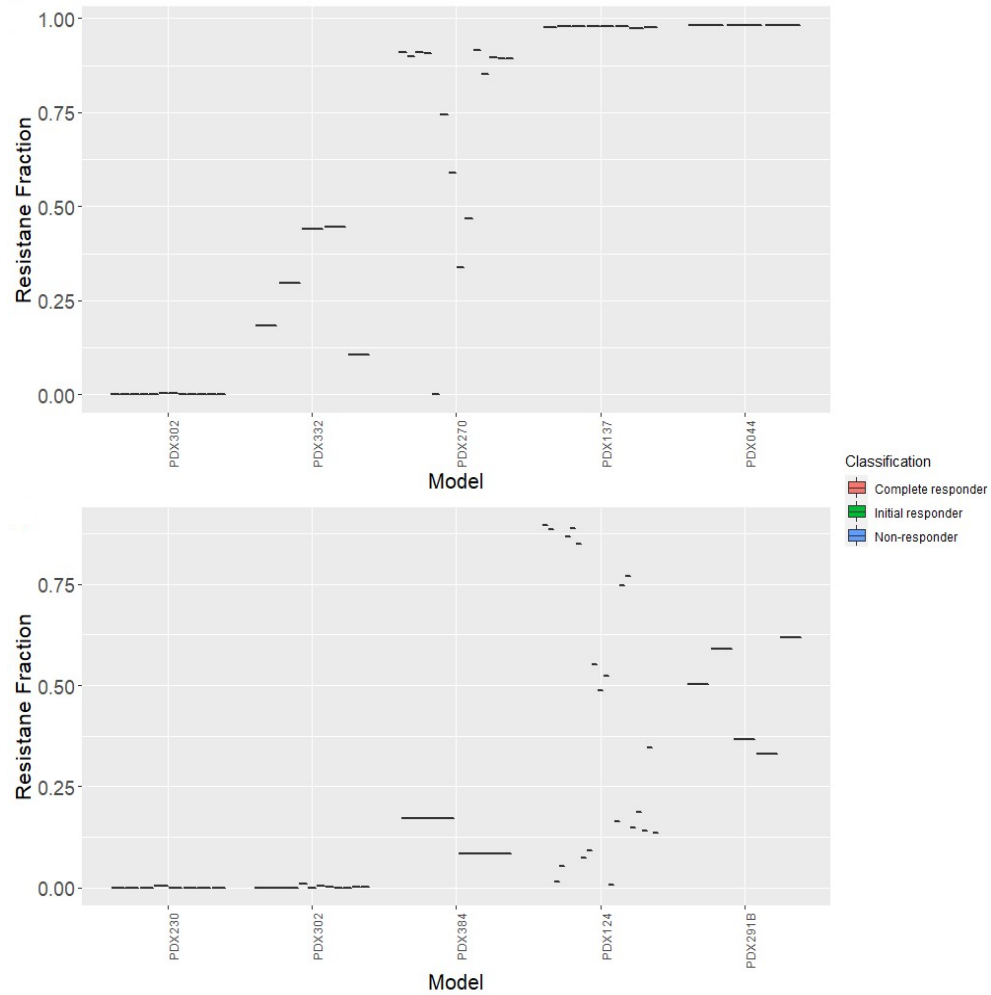

**Supplementary Figure 5.** Resistance fraction variability per mouse per PDX. Variability of the resistance fraction estimated for each mouse for each PDX in the 100 NONMEM runs. The boxplots are completely flat demonstrating the stability of the parameter estimation and the fact that the variability seen within the PDXs is due to resistance fraction variability between different mice instead of between different runs.

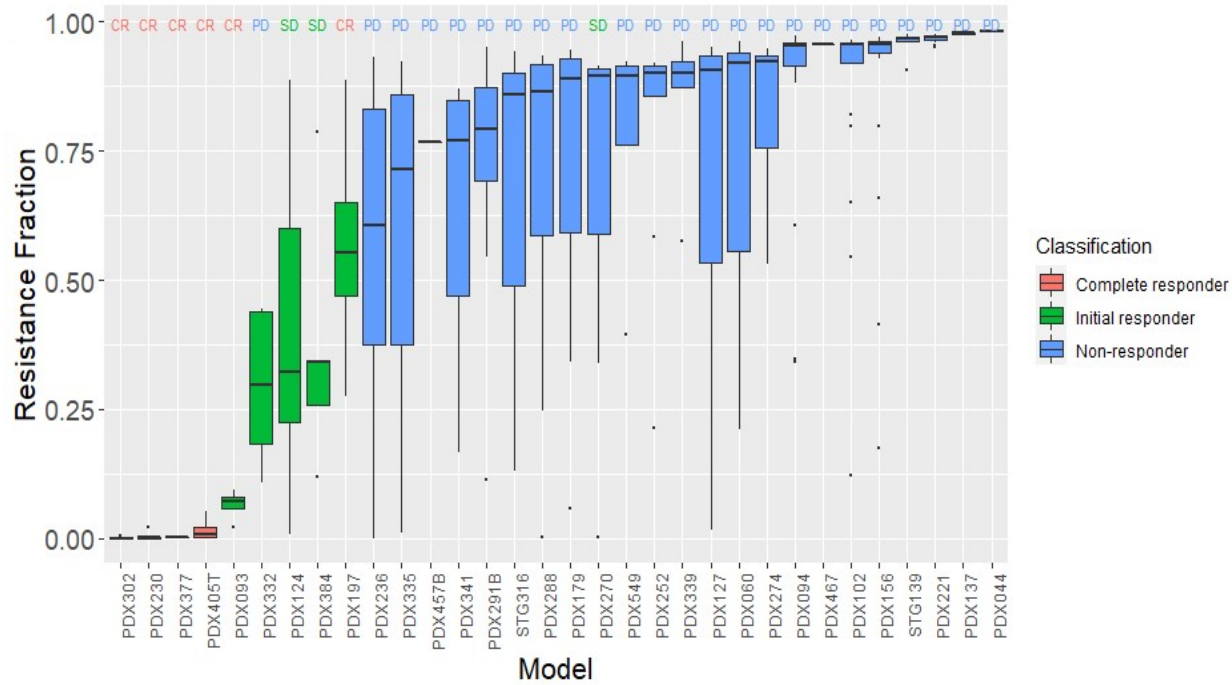

**Supplementary Figure 6.** Continuous and discrete Olaparib 50 mg/kg response of TNBC PDXs. Resistance fraction boxplots with median, min, max and upper and lower quartiles. mRECIST classification is found at the top of each boxplot representing 3 distinct categories: complete responders (CR), stable disease (SD) and progressive disease (PD) and colours represent the mathematical model classification into complete responders (red), initial responders (green) and non-responders (blue).

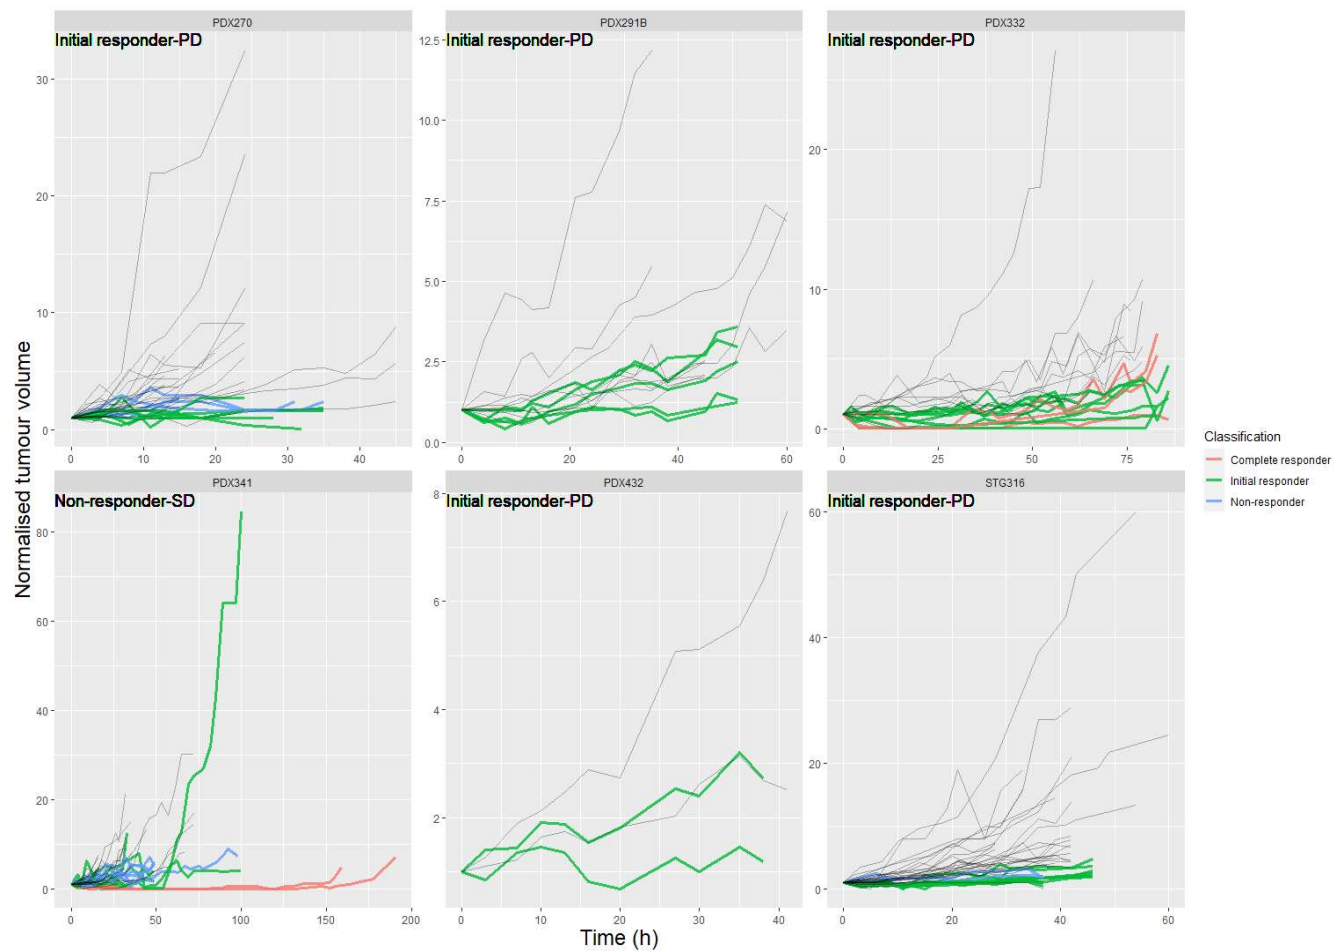

**Supplementary Figure 7.** MRECIST vs model classification olaparib 100 mg/kg. PDX models that have been classified differently using the MRECIST criteria and the model classification using the resistance fraction for olaparib 100 mg/kg monotherapy. Top left corner shows model classification vs MRECIST. Colour represent individual mice tumour classifications within each PDX. Classification for the model is decided through consensus (majority group) between the individual mice classification. Y-axis is the tumour volume normalised by the initial tumour volume.

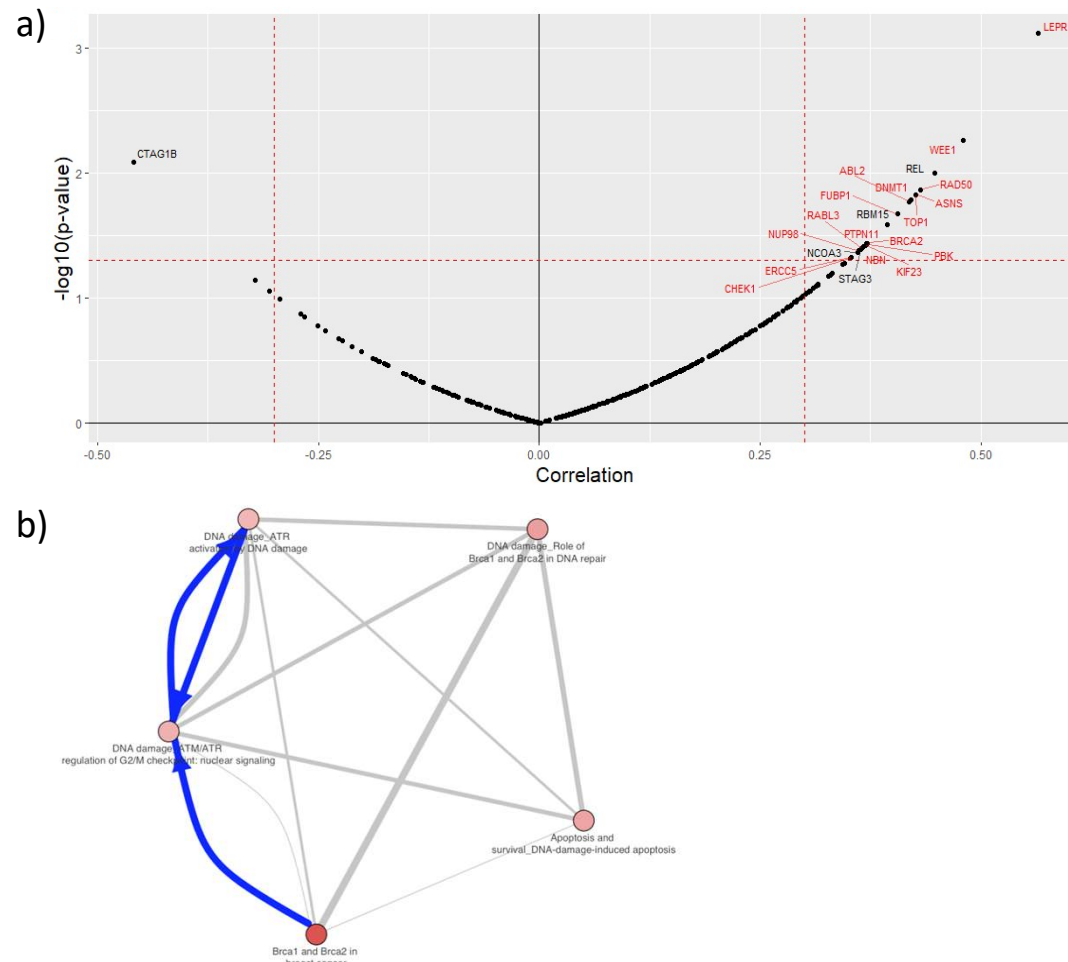

**Supplementary Figure 8.** Resistance correlation markers and enriched ontology terms. **a)** olaparib 50 mg/kg markers where Y-axis is the log transformed p-value with the threshold at  $p=0.05$ . The X-axis is the Pearson's correlation  $\rho$  with a threshold of 0.03 and -0.03. Highlighted in red are the markers found in both doses. **b)** Crosstalk analysis of olaparib 50 mg/kg hits: The network of the top 5 ontology terms from pathway enrichment analysis is depicted. Nodes represent top terms and edges represent significant similarities (as measured by hypergeometric test) between these entities. The edge thickness depends on the size of intersection between two ontology terms while the color of the node corresponds to the enrichment z-score.



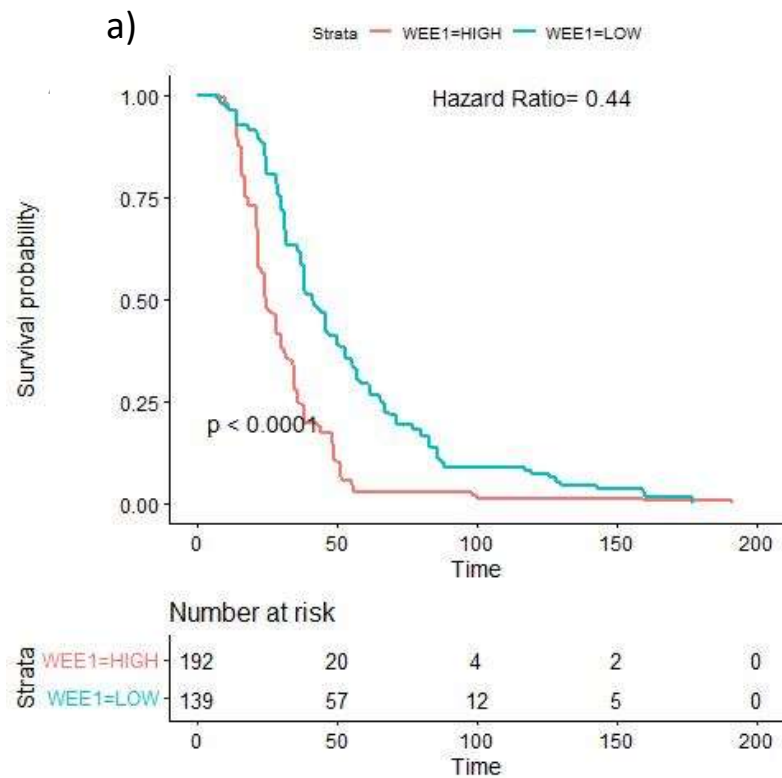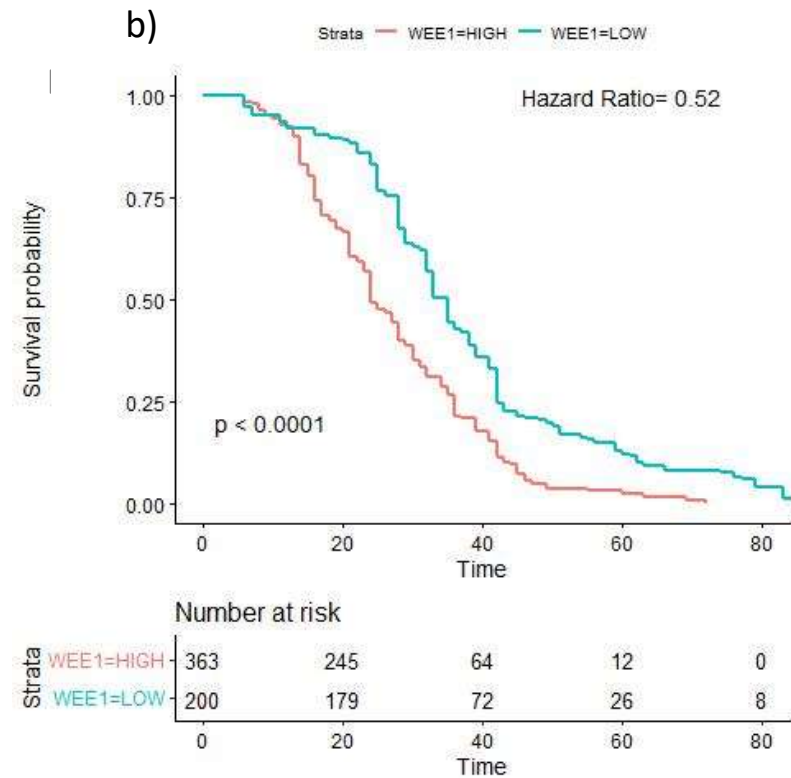

**Supplementary Figure 9.** WEE1 expression Kaplan-Meier plot for treated and untreated mice. Survival Kaplan-Meier curve for the treated and untreated mice based on median WEE1 expression. Low indicates PDXs with WEE1 expression less than the population median and HIGH inversely. A p-value  $< 0.05$  shows a significant separation between the two curves. Hazard ratio quantifies the difference between the two WEE1 expression groups. In this case less than 1 signifies less risk for LOW WEE1 and more than 1 less risk for HIGH WEE1 group respectively. **a)** Treated mice group shows an improvement in survival for LOW WEE1 expression. **b)** Untreated mice group also shows an improvement in survival for the LOW WEE1 mice but with a smaller separation than the untreated group (higher hazard ratio).

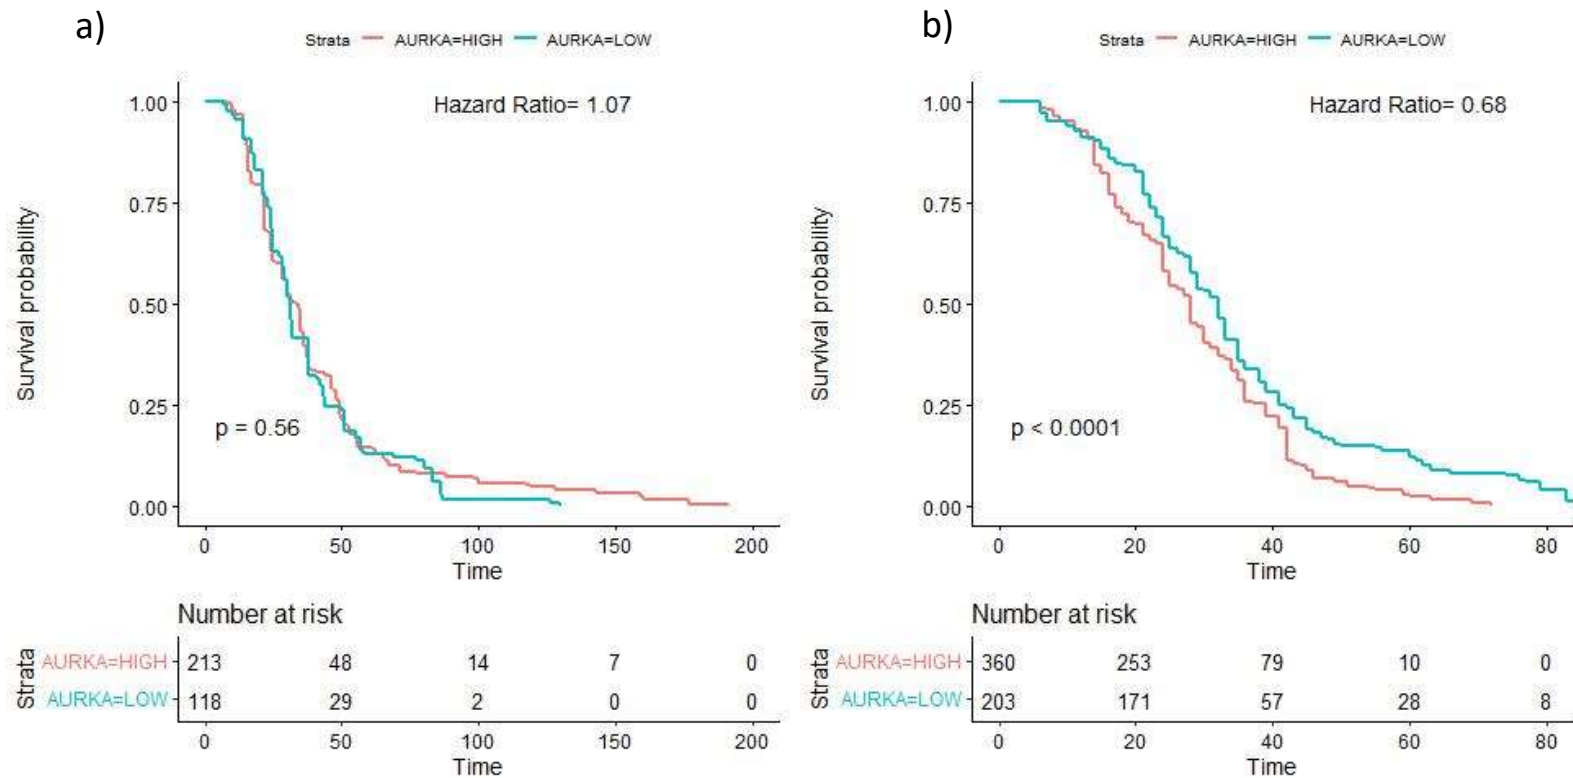

**Supplementary Figure 10.** AURKA expression Kaplan-Meier plot for treated and untreated mice. Survival Kaplan-Meier curve for the treated and untreated mice based on median AURKA expression. Low indicates PDXs with AURKA expression less than the population median and HIGH inversely. A p-value < 0.05 shows a significant separation between the two curves. Hazard ratio quantifies the difference between the two AURKA expression groups. In this case less than 1 signifies less risk for LOW AURKA and more than 1 less risk for HIGH AURKA group respectively. **a)** Treated mice group shows no improvement in survival for HIGH BRCA1 expression. **b)** Untreated mice group shows statistically significant difference in survival between LOW and HIGH AURKA.

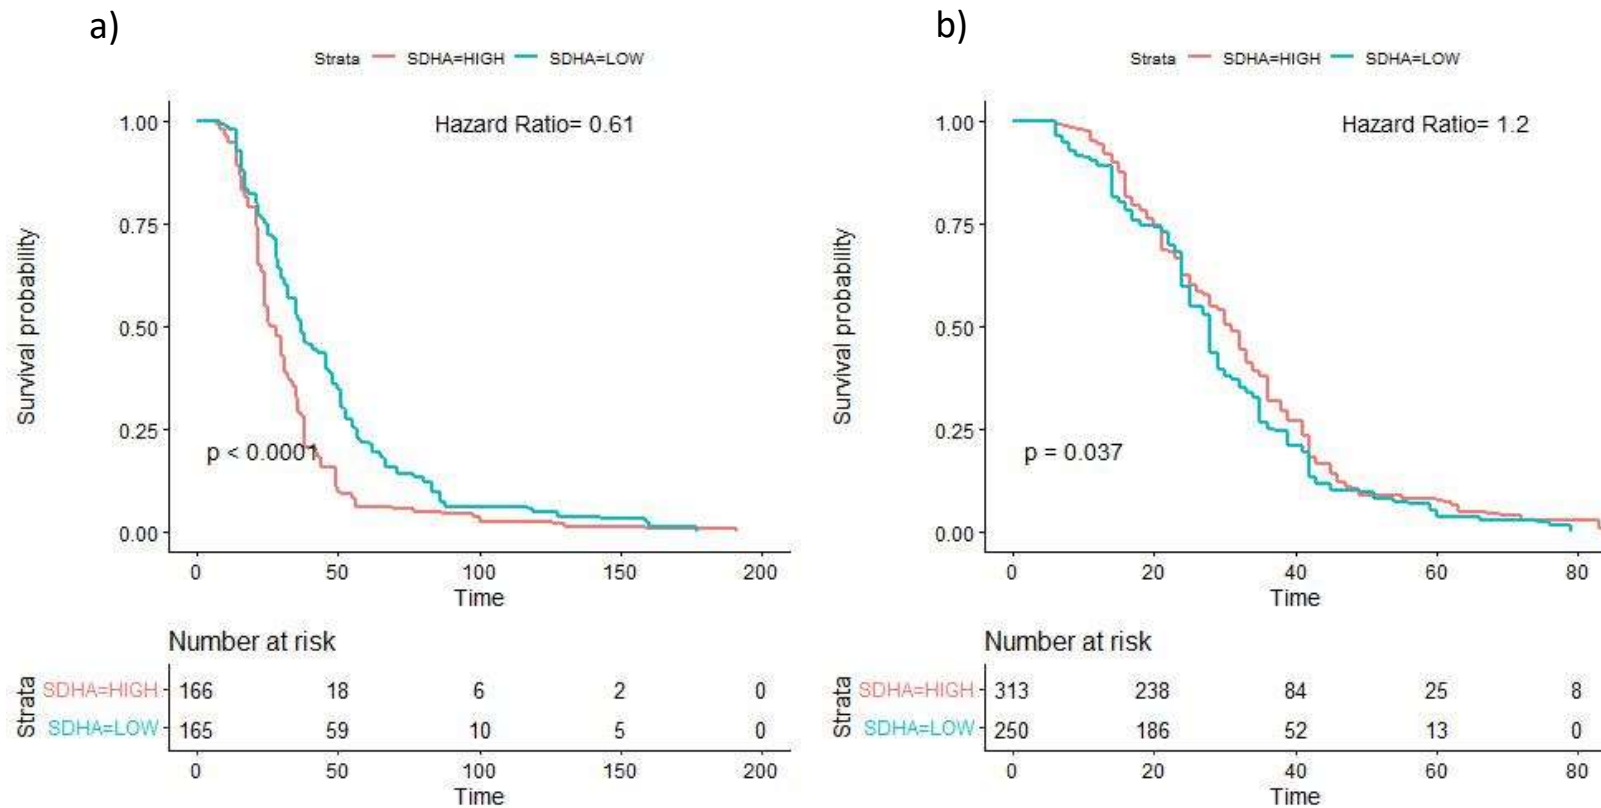

**Supplementary Figure 11.** SDHA expression Kaplan-Meier plot for treated and untreated mice. Survival Kaplan-Meier curve for the treated and untreated mice based on median SDHA expression. Low indicates PDXs with SDHA expression less than the population median and HIGH inversely. A p-value  $<0.05$  shows a significant separation between the two curves. Hazard ratio quantifies the difference between the two CTAG1B expression groups. In this case less than 1 signifies less risk for LOW SDHA and more than 1 less risk for HIGH SDHA group respectively, **a)** SDHA mice group shows an improvement in survival for LOW SDHA expression. **b)** Untreated mice group shows no improvement in survival for the HIGH SDHA mice opposite to the treated group.

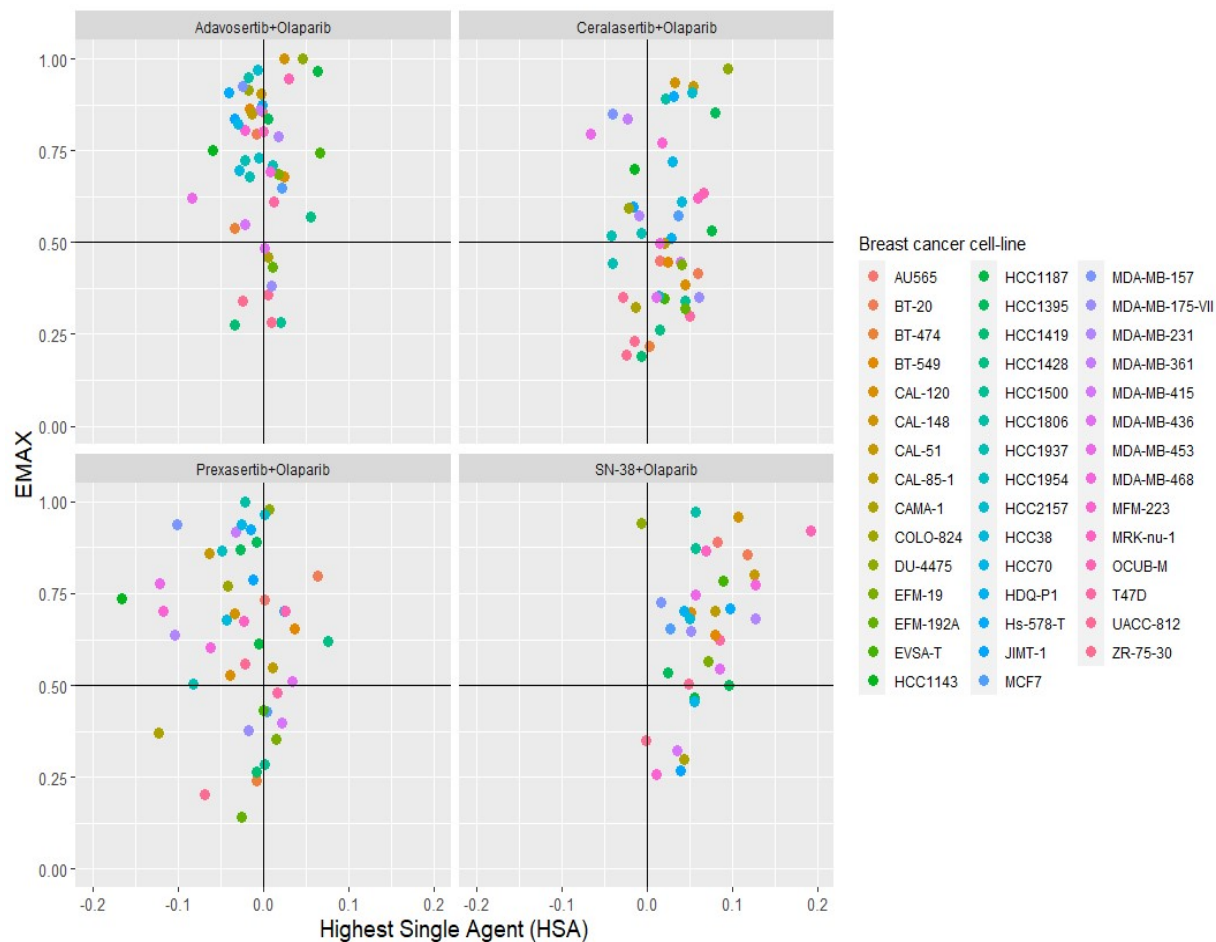

**Supplementary Figure 12.** *in vitro* validation experiments for Olaparib in vitro combination studies for top four resistance biomarkers – WEE1 (Adavosertib), ATR (Ceralasertib), CHK1/2 (Prexasertib), and TOP1 (SN-38), across 44 Breast Cancer cell lines. The scatterplots of EMAX vs Highest Single Agent comparing combination efficacy with synergy shows high synergy and combination efficacy for Olaparib + SN-38 as evidenced by the number of cell lines in the high EMAX-high HAS quadrant, whilst the other three combinations show high response but relatively low synergy, suggesting that actionable and selective synergy can be identified by this comparison.

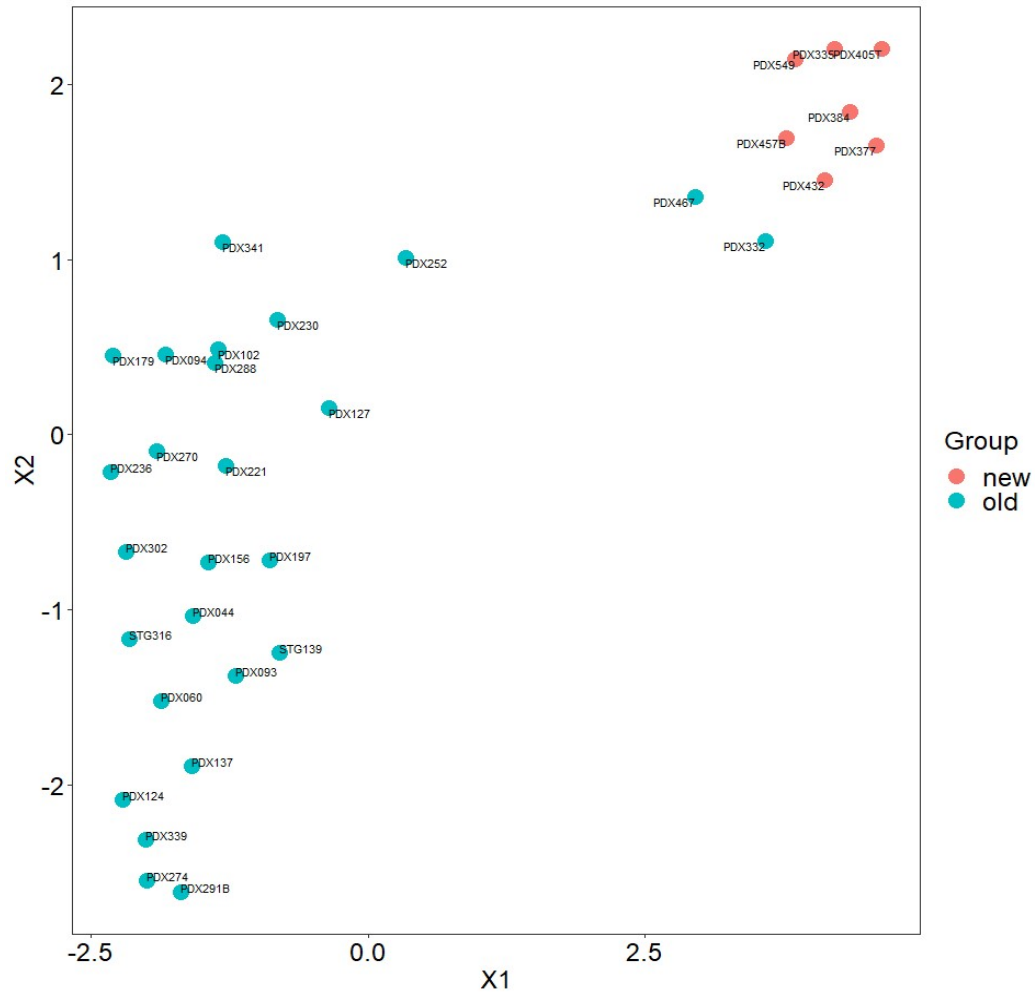

**Supplementary Figure 13.** UMAP of mRNA expression. Uniform Manifold Approximation and Projection (UMAP) dimensionality reduction and clustering for mRNA data of PDX triple negative breast cancer cohort in two dimensions X1 and X2. Colours are assigned based on the two batches that the PDXs were sequenced. With the exception of PDX457 and PDX332 there is a clear separation between the “old” and “new” batch. Batch correction is necessary to compare expression between PDXs.

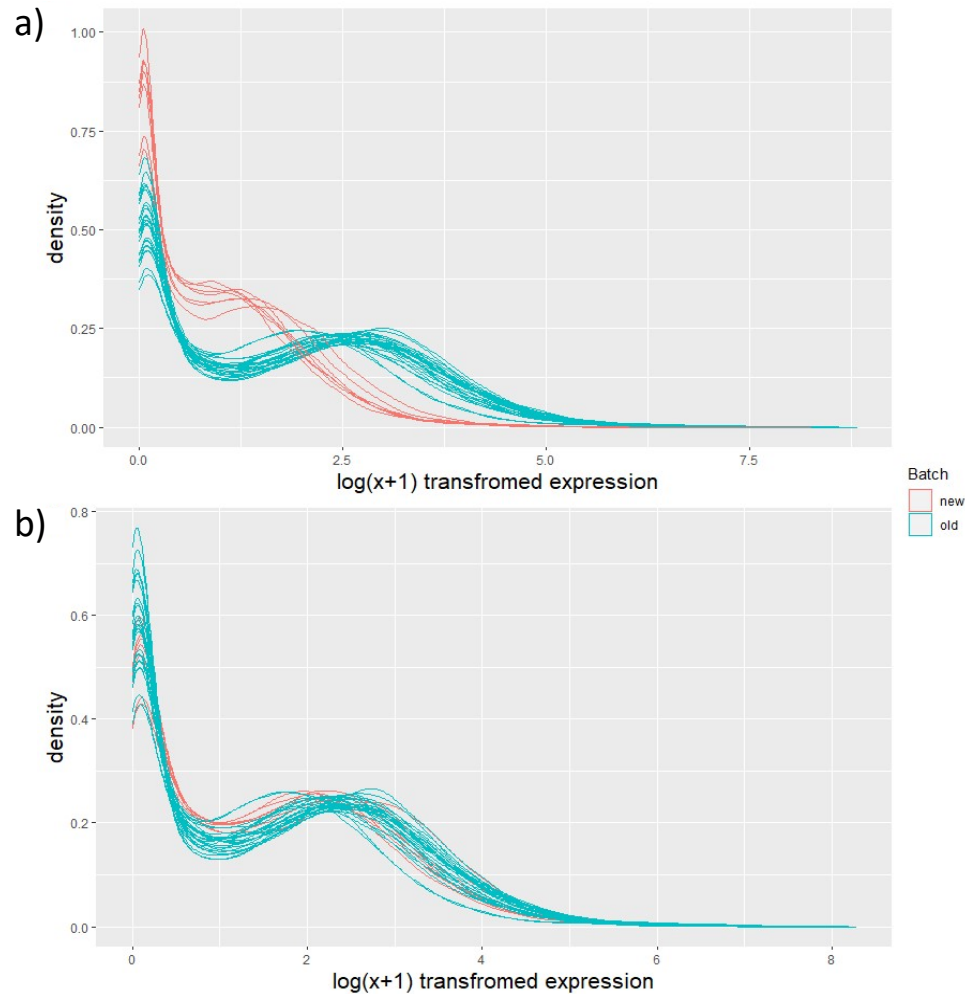

**Supplementary Figure 14.** LOG( $x+1$ ) transformed expression before and after ComBat correction. The colour represents the batch the PDXs was sequenced **a)** LOG( $X+1$ ) transformed data mRNA data for all TNBC PDXs before batch corrections. A separation between the expression profiles is visible between the two batches. **b)** LOG( $X+1$ ) transformed data mRNA data for all TNBC PDXs after ComBat batch corrections. No separation between the expression profiles is visible between the two batches

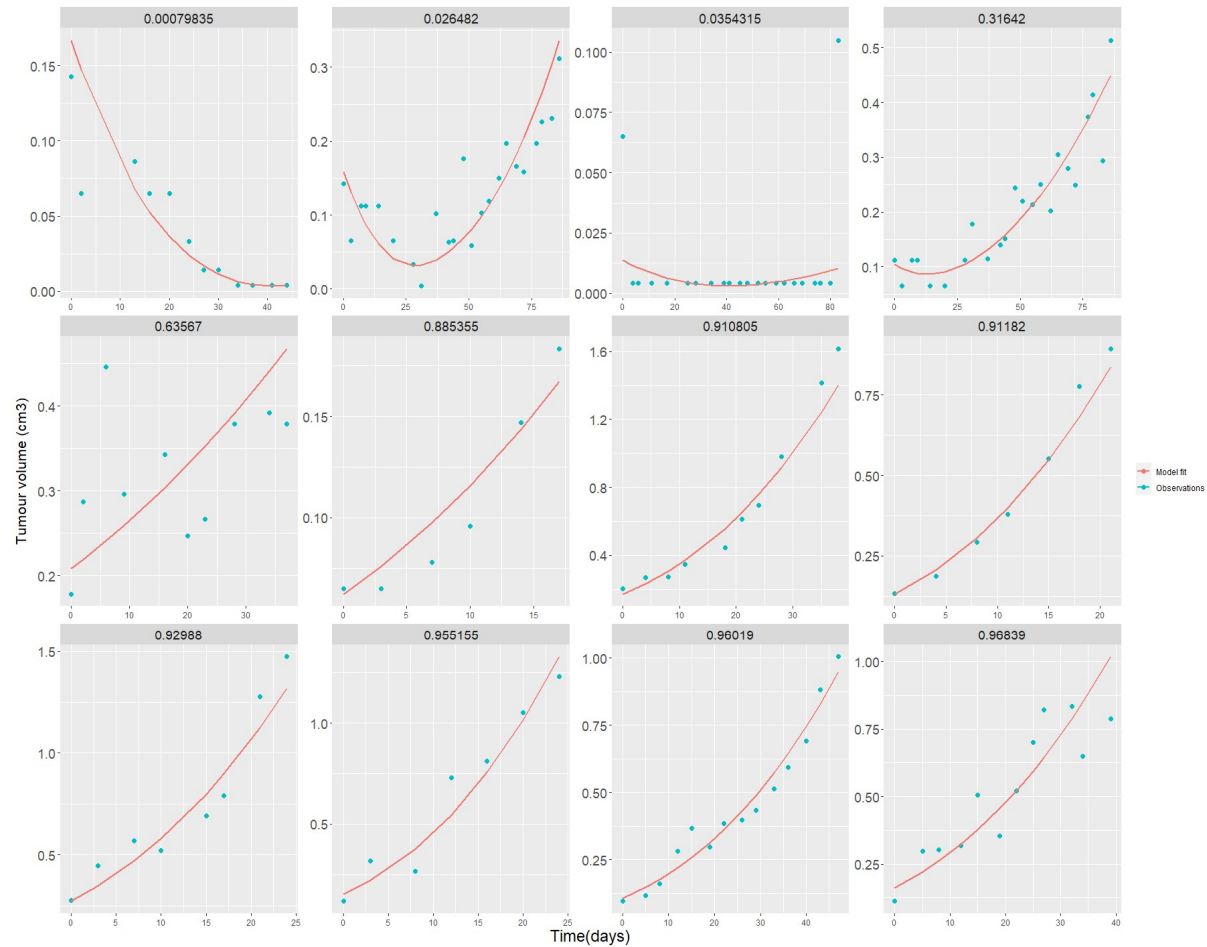

**Supplementary Figure 15.** Observations vs individual predictions for selected IDs. Blue dots represent the data (observations) and the red line is the model fit. The data demonstrate all three types of response (complete, non-response and initial followed by relapse) and the model is able to capture it. The resistance fraction (Fr) value is shown on the top of each box.

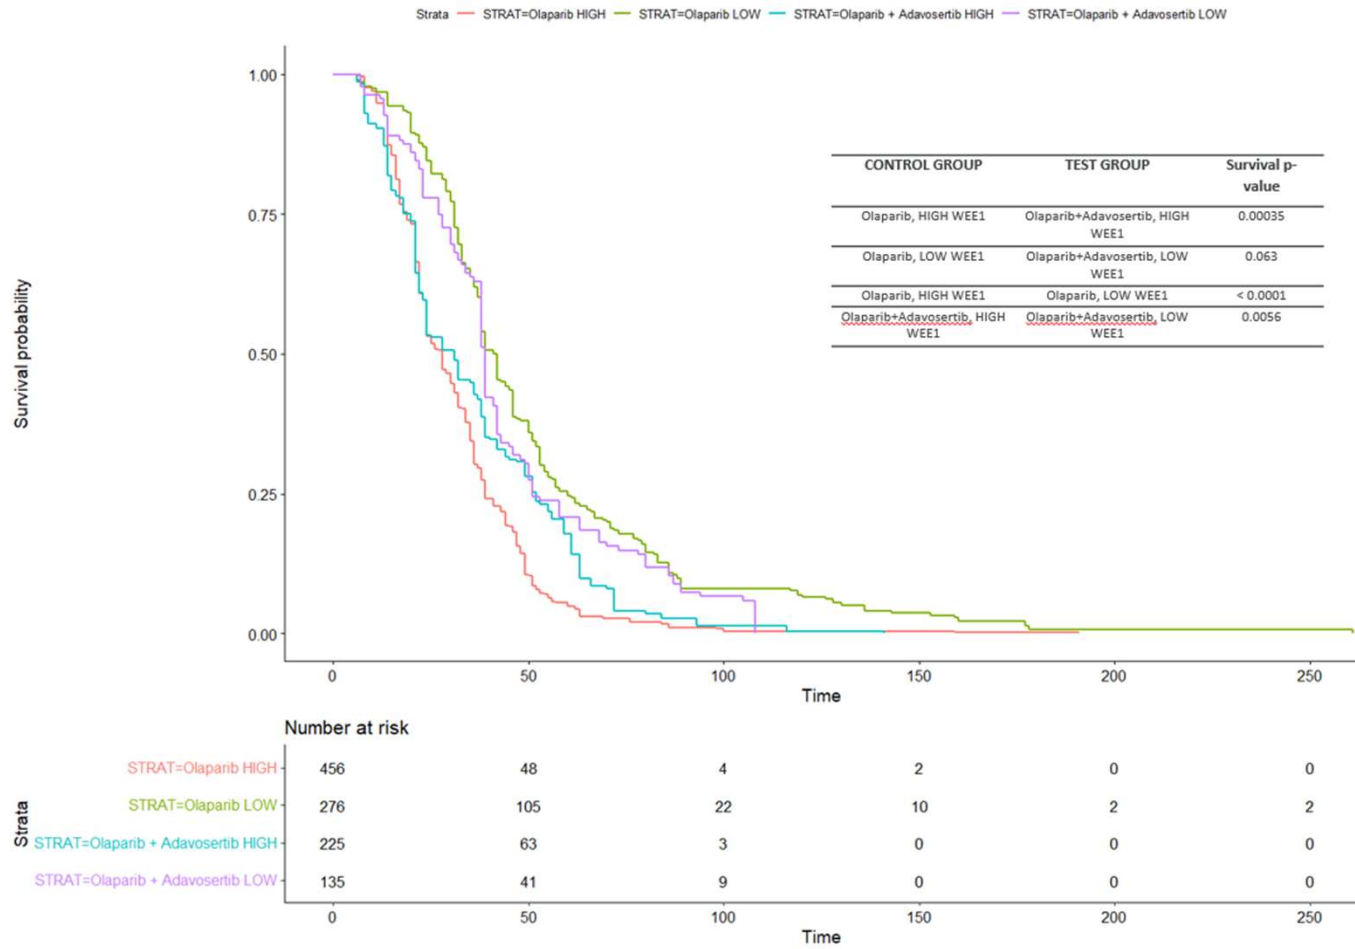

**Supplementary Figure 16.** Kaplan-Meier survival plots stratified by treatment and WEE1 expression levels. Olaparib single agent and combination with adavosertib are compared against each other for LOW and HIGH WEE1 expression levels in addition to the single agent and combination survivability being compared to itself for different WEE1 expression levels.



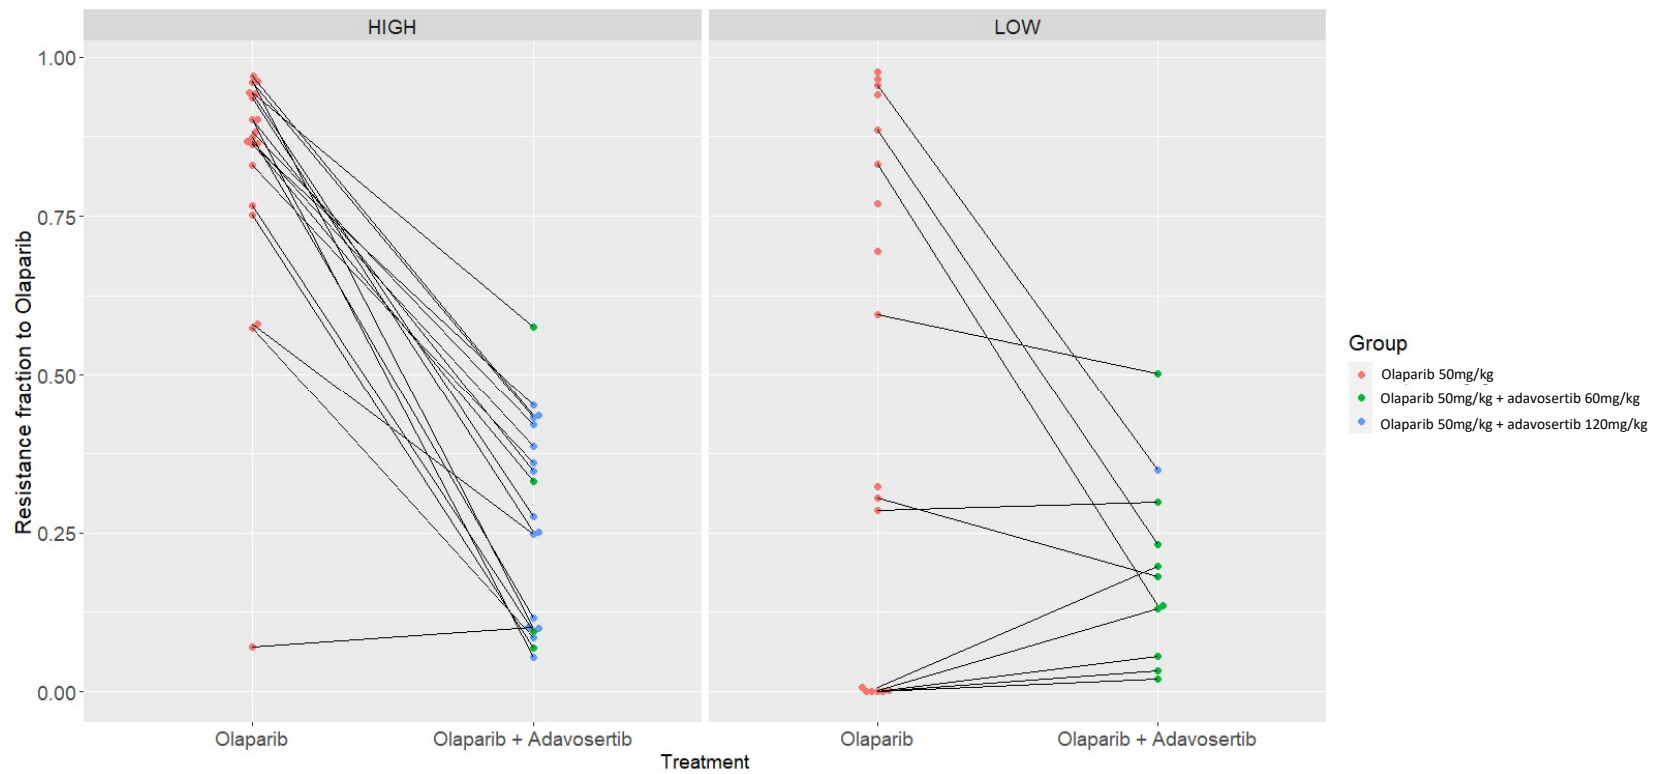

**Supplementary Figure 17.** Effect of *WEE1* expression on olaparib and adavosertib resistance fractions. Facets represent expression levels of *WEE1* with respect to the median expression value in the cohort of PDXs. Individual point colour specifies treatment group. Lines connect same PDXs in the different groups **A**. Resistance fraction of adavosertib is stratified with respect to *WEE1* expression levels for adavosertib single agent. **B**. Resistance fraction of olaparib is stratified with respect to *WEE1* expression levels for olaparib single agent and adavosertib combination. Also separated by dose for either drug.

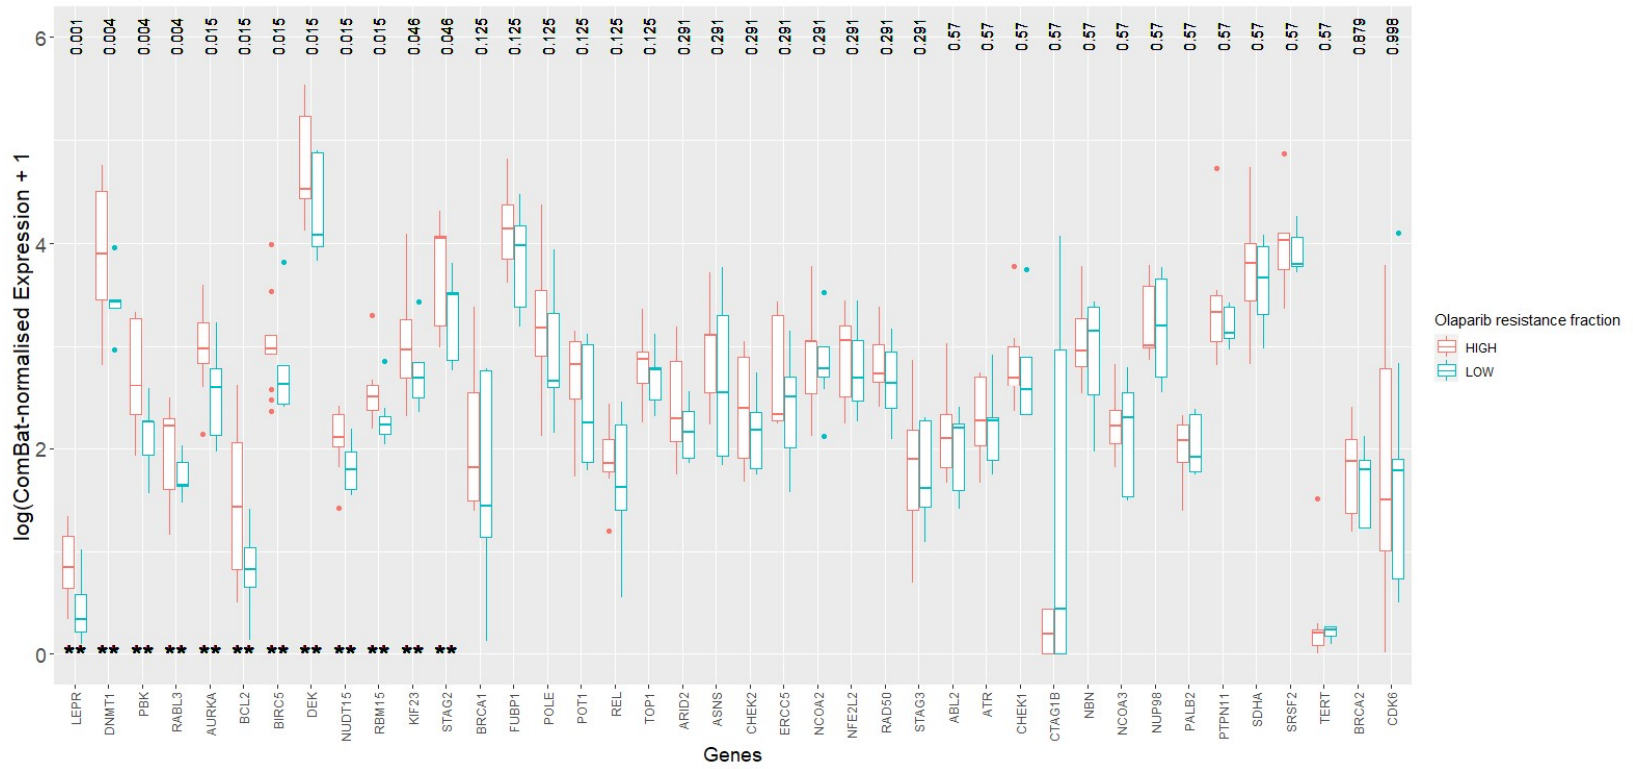

**Supplementary Figure 18.** Gene expression group by olaparib resistance fraction in low-WEE1 PDXs. \*\* represents statistically significant differences in expression as tested using Kolmogorov-Smirnov test (p-value < 0.05). Markers are order by ascending p-value seen on the top of the plot.

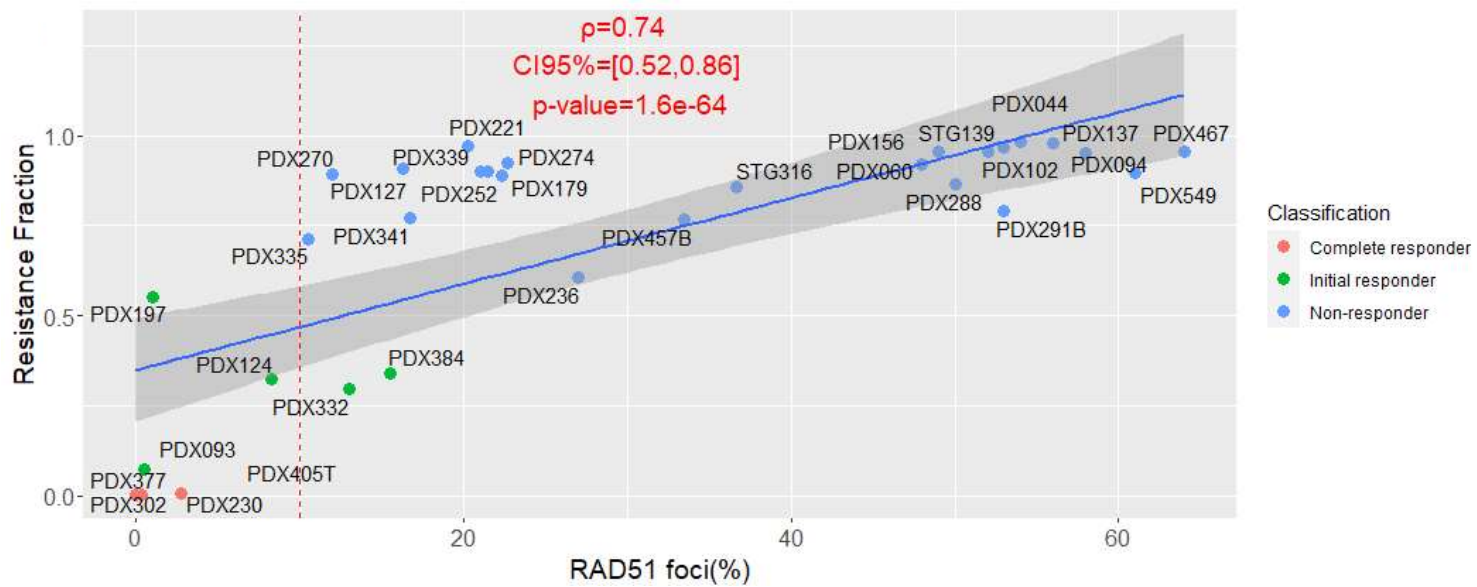

**Supplementary Figure 19.** Pearson's correlation of resistance fraction to RAD51 foci score for Olaparib 50 mg/kg. Colour assigned by classification using the resistance model. Pearson's  $\rho$  value, 95% confidence intervals and p-value are included. Red dotted line corresponds to the 10% threshold for differentiating PARPi-sensitive from PARPi-resistant.

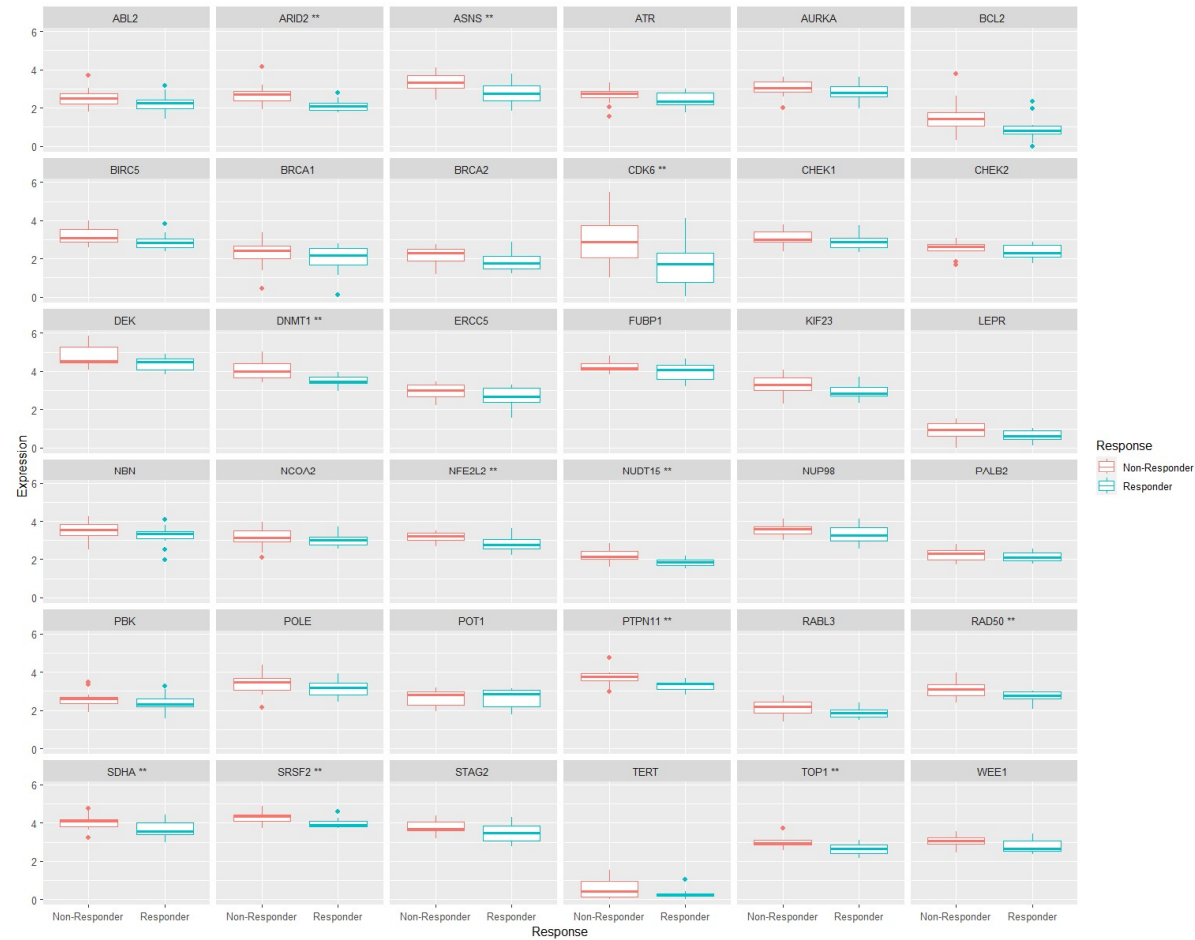

**Supplementary Figure 20.** Responder vs non-responder distribution of selected genes. Non-responders corresponds to PDXs classified as progressive disease (PD) based on the modified RECIST criteria and responders to complete response (CR) or stable disease (SD). Significant difference between the mean of the two distributions for each gene is tested using the Mann-Whitney U test and denoted by \*\* next to the name of the gene.

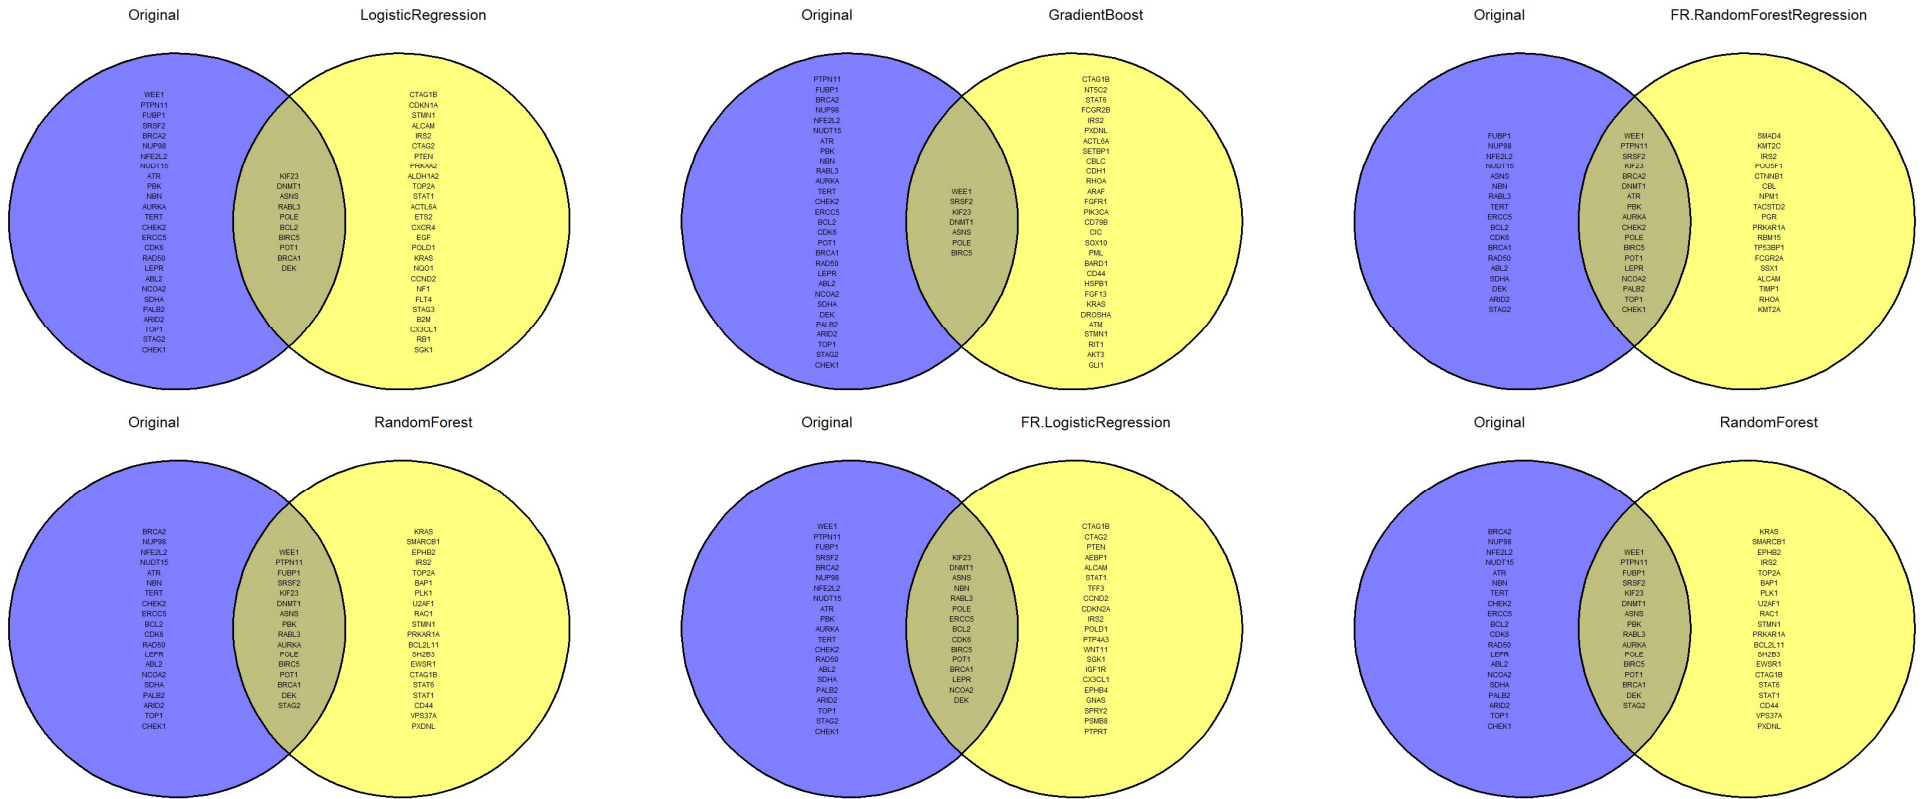

**Supplementary Figure 21.** Biomarker selection using the original linear correlation vs various ML methods. 36 markers were identified as significant using the linear correlation and to that end for each ML feature selection method we kept the top 36 marker based on weight/importance. Many markers are shared between the simple correlation and the ML methods with markers such as BIRC5, KIF23, DNMT1 and POLE being common in all methods and WEE1 included as one of the top features in 4/6 ML methods. Random forest methods and methods that use the continuous metric of resistance fraction (FR) as output share more common markers with the correlation.

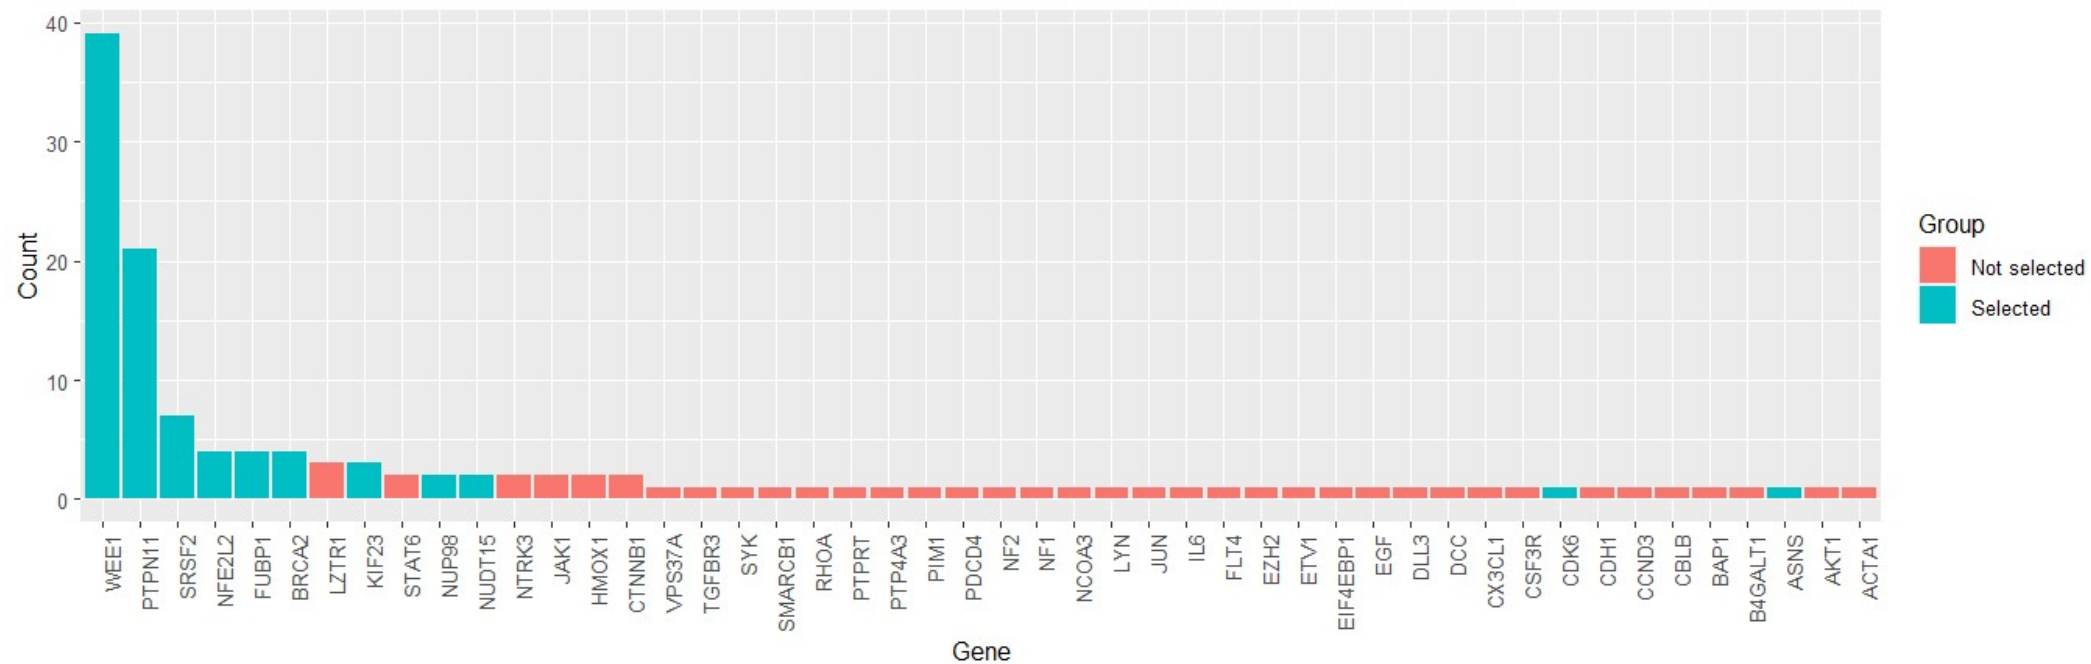

**Supplementary Figure 22.** Bar plot of common genes between train and test sets for 100 splits. The 27 unique expression profiles (PDXs) treated with olaparib 100 mg/kg were split into train (18) and test (9) sets randomly 100 times. The mRNA expression of the CIVIC genes was correlated to the Resistance Fraction and significant genes selected according to p-value ( $<0.05$ ). The count represents the number of times a gene was found as significant in both the train and test split for each of the 100 splits. The colour represents the selected genes, i.e. the ones that were found to be significant in the original correlation analysis with all 27 PDXs (blue) and the ones that were not found to be significant (red).

| Parameter           | Definition                                             | Value  | RSV(%) |
|---------------------|--------------------------------------------------------|--------|--------|
| $THETA_K$           | Fixed effect for growth rate                           | 0.0408 | 4.2    |
| $THETA_{50}$        | Fixed effect for olaparib 50 mg/kg                     | 0.2939 | 4.4    |
| $THETA_{100}$       | Extra fixed effect for olaparib 100 mg/kg              | 0.2127 | 10.9   |
| $THETA_{fr}$        | Fixed effect for resistance fraction                   | 1.494  | 14.2   |
| $THETA_{V0}$        | Fixed effect for baseline tumour volume                | 0.136  | 1.5    |
| $\omega_K$          | Random effect for growth rate                          | 0.64   | 9.4    |
| $\omega_{fr}^{ID}$  | Random effect for resistance fraction individual level | 2.846  | 8.2    |
| $\omega_{fr}^{PDX}$ | Random effect for resistance fraction PDX level        | 3.368  | 69.8   |
| $\omega_{V0}$       | Random effect for baseline tumour volume               | 0.684  | 5.2    |

**Supplementary Table 1.** Estimated parameter for Olaparib monotherapy resistance model.

| Parameter                        | Definition                                                         | Value   | RSV(%) |
|----------------------------------|--------------------------------------------------------------------|---------|--------|
| $THETA_{60}$                     | Fixed effect for adavosertib 60 mg/kg                              | -0.3898 | 4.8    |
| $THETA_{extra}$                  | Extra fixed effect for adavosertib 120 mg/kg                       | 1.536   | 11.2   |
| $THETA_{fr}^{olaparib}$          | Fixed effect for resistance fraction of olaparib                   | -1.295  | 15.1   |
| $THETA_{fr}^{adavosertib}$       | Fixed effect for resistance fraction of adavosertib                | -0.5529 | 12.5   |
| $\omega_{fr}^{adavosertib\_ID}$  | Random effect for adavosertib resistance fraction individual level | 0.9098  | 7.4    |
| $\omega_{fr}^{adavosertib\_PDX}$ | Random effect for adavosertib resistance fraction PDX level        | 0.7135  | 62.3   |
| $\omega_{fr}^{olaparib\_ID}$     | Random effect for olaparib resistance fraction individual level    | 0.9028  | 8.8    |
| $\omega_{fr}^{olaparib\_PDX}$    | Random effect for olaparib resistance fraction PDX level           | 1.089   | 68.7   |

**Supplementary Table 2.** Estimated parameter for combination and adavosertib monotherapy resistance model.



| #  | Maps                                                                | Total | p-value   | FDR       | In Data | Network Objects from Active Data |
|----|---------------------------------------------------------------------|-------|-----------|-----------|---------|----------------------------------|
| 1  | BRCA1 and BRCA2 in breast cancer                                    | 19    | 1.565E-08 | 2.660E-06 | 4       | CHEK1, NBN, BRCA2, RAD50         |
| 2  | DNA damage_Role of BRCA1 and BRCA2 in DNA repair                    | 30    | 1.243E-05 | 1.056E-03 | 3       | NBN, BRCA2, RAD50                |
| 3  | DNA damage_ATM/ATR regulation of G2/M checkpoint: nuclear signaling | 45    | 4.280E-05 | 2.425E-03 | 3       | CHEK1, WEE1, DNMT1               |
| 4  | DNA damage_ATR activation by DNA damage                             | 53    | 7.011E-05 | 2.980E-03 | 3       | CHEK1, NBN, RAD50                |
| 5  | Apoptosis and survival_DNA-damage-induced apoptosis                 | 15    | 2.354E-04 | 8.004E-03 | 2       | CHEK1, NBN                       |
| 6  | Cell cycle_Role of 14-3-3 proteins in cell cycle regulation         | 22    | 5.146E-04 | 1.458E-02 | 2       | CHEK1, WEE1                      |
| 7  | Cell cycle_Role of SCF complex in cell cycle regulation             | 29    | 8.986E-04 | 2.182E-02 | 2       | CHEK1, WEE1                      |
| 8  | Signal transduction_Leptin signaling via JAK/STAT and MAPK cascade  | 39    | 1.625E-03 | 3.391E-02 | 2       | LEPR, PTPN11                     |
| 9  | Breast cancer (general schema)                                      | 41    | 1.795E-03 | 3.391E-02 | 2       | LEPR, BRCA2                      |
| 10 | Canonical Leptin pathways in breast cancer                          | 47    | 2.353E-03 | 4.001E-02 | 2       | LEPR, PTPN11                     |

**Supplementary Table 3.** Enrichment pathway maps-olaparib 50mg/kg

| #  | Maps                                                                    | Total | p-value   | FDR       | In Data | Network Objects from Active Data             |
|----|-------------------------------------------------------------------------|-------|-----------|-----------|---------|----------------------------------------------|
| 1  | BRCA1 and BRCA2 in breast cancer                                        | 19    | 9.030E-12 | 3.413E-09 | 6       | CHEK1, NBN, ATR, BRCA2, RAD50, BRCA1         |
| 2  | DNA damage_ATM/ATR regulation of G2/M checkpoint: nuclear signaling     | 45    | 3.397E-11 | 6.420E-09 | 7       | CHEK1, ATR, BRCA1, WEE1, PALB2, DNMT1, CHEK2 |
| 3  | DNA damage_Role of BRCA1 and BRCA2 in DNA repair                        | 30    | 1.933E-10 | 2.435E-08 | 6       | NBN, ATR, BRCA2, RAD50, BRCA1, CHEK2         |
| 4  | Apoptosis and survival_DNA-damage-induced apoptosis                     | 15    | 4.113E-10 | 3.887E-08 | 5       | CHEK1, NBN, ATR, BRCA1, CHEK2                |
| 5  | DNA damage_DNA-damage-induced responses                                 | 9     | 6.903E-09 | 5.219E-07 | 4       | CHEK1, ATR, BRCA1, CHEK2                     |
| 6  | DNA damage_ATM/ATR regulation of G2/M checkpoint: cytoplasmic signaling | 51    | 2.990E-07 | 1.883E-05 | 5       | CHEK1, AURKA, ATR, BRCA1, CHEK2              |
| 7  | Cell cycle_Role of 14-3-3 proteins in cell cycle regulation             | 22    | 3.904E-07 | 2.108E-05 | 4       | CHEK1, ATR, WEE1, CHEK2                      |
| 8  | DNA damage_p53 activation by DNA damage                                 | 60    | 6.824E-07 | 3.224E-05 | 5       | CHEK1, ATR, BRCA1, BCL2, CHEK2               |
| 9  | DNA damage_BRCA1 as a transcription regulator                           | 30    | 1.439E-06 | 5.439E-05 | 4       | TERT, ATR, BRCA1, CHEK2                      |
| 10 | DNA damage_G2 checkpoint in response to DNA mismatches                  | 30    | 1.439E-06 | 5.439E-05 | 4       | CHEK1, ATR, BRCA1, CHEK2                     |

**Supplementary Table 4.** Enrichment pathway maps-olaparib 100mg/kg

| PDX     | P/M | Previous treatment | Cancer subtype | HRR gene | cDNA change      | AA change    | Domain                       | Variant effect | CNV      | BRCA1 promoter hypermethylation | RAD51 foci |
|---------|-----|--------------------|----------------|----------|------------------|--------------|------------------------------|----------------|----------|---------------------------------|------------|
| PDX044  | M   | T                  | TNBC           |          |                  |              |                              |                |          |                                 | 54         |
| PDX060  | M   | T                  | TNBC           |          |                  |              |                              |                |          |                                 | 48         |
| PDX093  | P   | N                  | TNBC           | PALB2    | c.886dupA        | p.M296fs     | Non recognized domain region | Frameshift     |          |                                 | 0.5        |
| PDX094  | P   | T                  | TNBC           |          |                  |              |                              |                |          |                                 | 58         |
| PDX102  | P   | N                  | TNBC           |          |                  |              |                              |                |          |                                 | 52         |
| PDX124  | M   | T                  | TNBC           | BRCA1    | c.1961delA       | p.K654fs     | Exon 11                      | Frameshift     |          |                                 | 8.3        |
| PDX127  | M   | T                  | TNBC           | BRCA1    | c.185delAG       | p.E23fs      | Ring                         | Frameshift     |          |                                 | 16.3       |
| PDX137  | M   | T                  | TNBC           |          |                  |              |                              |                |          |                                 | 56         |
| PDX156  | M   | T                  | TNBC           |          |                  |              |                              |                |          |                                 | 49         |
| PDX179  | M   | T                  | TNBC           | BRCA1    | c.185delAG       | p.E23fs      | Ring                         | Frameshift     |          |                                 | 22.3       |
| PDX197  | P   | T                  | TNBC           | BRCA1    |                  |              |                              |                |          | Yes                             | 1          |
| PDX221  | P   | T                  | TNBC           | BRCA1    | c.5027delT       | p.L1676fs    | BRCT                         | Frameshift     |          |                                 | 20.3       |
| PDX230  | P   | T                  | TNBC           | BRCA1    | c.185delAG       | p.E23fs      | Ring                         | Frameshift     |          |                                 | 0.3        |
| PDX236  | M   | T                  | TNBC           | BRCA1    | c.5194-12G>A     |              | Intronic variant             | Splicing       |          |                                 | 27         |
| PDX252  | M   | T                  | TNBC           | BRCA1    | c.5123C>A        | p.A1708E     | BRCT                         | Missense       |          |                                 | 21.5       |
| PDX270  | P   | N                  | TNBC           | BRCA1    |                  |              |                              |                |          | Yes                             | 12         |
| PDX274  | M   | T                  | TNBC           | BRCA1    |                  |              |                              |                | Homoloss |                                 | 22.7       |
| PDX288  | M   | T                  | TNBC           |          |                  |              |                              |                |          |                                 | 50         |
| PDX291B | M   | T                  | TNBC           |          |                  |              |                              |                |          |                                 | 53         |
| PDX302  | M   | T                  | TNBC           | BRCA1    |                  |              |                              |                |          | Yes                             | 0          |
| PDX332  | M   | T                  | TNBC           |          | c.7796A>G        | p.E2599G     | DNA binding (Helical domain) | Missense       |          |                                 | 13         |
| PDX335  | M   | T                  | TNBC           | BRCA2    | c.7796A>G        | p.E2599G     | DNA binding (Helical domain) | Missense       |          |                                 | 10.5       |
| PDX339  | M   | T                  | TNBC           | BRCA1    | c.211A>G         | p.R71G       | Ring                         | Missense       |          |                                 | 21         |
| PDX341  | M   | T                  | TNBC           | BRCA1    | c.2404delGA      | p.R762fs     | Exon 11                      | Frameshift     |          |                                 | 16.7       |
| PDX377  | M   | T                  | TNBC           | BRCA1    | c.1912delG       | p.E638fs     | Exon 11                      | Frameshift     |          |                                 | 0          |
| PDX384  | M   | T                  | TNBC           | BRCA1    | c.791-794delGTTC | p.S264Mfs*33 | Exon 11                      | Frameshift     |          |                                 | 15.5       |
| PDX405T | M   | T                  | TNBC           | BRCA2    | c.5909C>A        | p.S1970*     | Non recognized domain region | Nonsense       |          |                                 | 2.7        |
| PDX432  | M   | T                  | TNBC           |          |                  |              |                              |                |          |                                 | 4.5        |
| PDX457B | M   | T                  | TNBC           |          |                  |              |                              |                |          |                                 | 33.5       |
| PDX467  | P   | T                  | TNBC           |          |                  |              |                              |                |          |                                 | 64         |
| PDX549  | P   | T                  | TNBC           |          |                  |              |                              |                |          |                                 | 61         |
| STG139  | P   | T                  | TNBC           |          |                  |              |                              |                |          |                                 | 53         |
| STG316  | P   | T                  | TNBC           | BRCA1    | c.134+3A>C       |              | Intronic variant             | Splicing       |          |                                 | 36.7       |

**Supplementary Table 5.** Clinical and molecular characteristics of PDX cohort. Clinical characteristics of PDXs used in the study including RAD51 foci, previous treatment information, mutations. The acronyms are explained in the abbreviations table below.

| <b>Term</b>                     | <b>Abbreviation</b> |
|---------------------------------|---------------------|
| Primary                         | P                   |
| Metastatic                      | M                   |
| Treated                         | T                   |
| Naïve                           | N                   |
| Triple Negative Breast Cancer   | TNBC                |
| Ovarian Cancer                  | OvC                 |
| Estrogen receptor-positive      | ER+                 |
| Pancreatic Cancer               | PaC                 |
| Homologous recombination repair | HRR                 |
| complementary DNA               | cDNA                |
| Aminoacid                       | AA                  |
| Copy number variant             | CNV                 |
| messenger RNA                   | mRNA                |
| AstraZeneca                     | AZ                  |
| Non-available                   | NA                  |

| Gene   |         |         |          |         |         |         |         |         |          |          |          |
|--------|---------|---------|----------|---------|---------|---------|---------|---------|----------|----------|----------|
| ALK    | RET     | ABL2    | CRKL     | FANCA   | HSPB1   | NEDD9   | PTPRB   | TGFA    | AKT3     | FOXP3    | ARID2    |
| AKT1   | RUNX1   | ACTA1   | CSF1     | FANCC   | IGF1R   | NF1     | PTPRD   | TGFBR3  | BCL2L11  | CRBN     | FLCN     |
| ARAF   | SF3B1   | ACTL6A  | CSF3R    | PTK2B   | IL2RB   | NF2     | PTPRF   | THBS2   | SH2B3    | DDX41    | RICTOR   |
| ABL1   | TP53    | ACVR1   | CTAG1B   | FCGR2A  | IL6     | NFE2L2  | RAC1    | TIMP1   | RAD50    | SUFU     | RABL3    |
| BRAF   | TSC1    | PARP1   | CCN2     | FCGR2B  | IL7R    | NOTCH3  | RAD23B  | TMPRSS2 | SPRY2    | CDK12    | ATXN1L   |
| BRCA1  | TSC2    | AEBP1   | CTLA4    | FCGR3A  | CXCL10  | NT5E    | RAD51D  | TOP1    | MAEA     | RSF1     | MIR21    |
| BRCA2  | U2AF1   | AKT2    | CTNNB1   | FGF2    | JAK1    | NTRK1   | RAF1    | TOP2A   | TUBB3    | LRP1B    | MIR218-1 |
| CCND1  | WT1     | ALCAM   | CYP2D6   | FGF3    | JAK3    | NTRK2   | RASA1   | TP53BP1 | YAP1     | ERRFI1   | ECSCR    |
| CCND2  | NOTCH1  | BIRC3   | DBI      | FGF13   | JUN     | NTRK3   | RB1     | TPT1    | MERTK    | ROBO4    | KLLN     |
| CCND3  | DDR2    | BIRC5   | DCC      | FGFR1   | KDR     | NUP98   | RELA    | TSPYL1  | HOXB13   | UGT1A1   | DUX4     |
| CCNE1  | MET     | AREG    | GADD45A  | FGFR4   | KRT18   | PRKN    | RHEB    | TYMS    | NCOA2    | BCOR     | PRNCR1   |
| CDK6   | FLI1    | RHOA    | DDIT3    | FOXC2   | LAG3    | PAX5    | RIT1    | UGT1A   | AGR2     | NUDT15   |          |
| CDK4   | EWSR1   | ASCL1   | DEFA1    | FOXO1   | STMN1   | PCNA    | ROS1    | KDM6A   | SLCO1B1  | FBXW7    |          |
| CDKN2A | TET2    | ASNS    | NQO1     | FOXO3   | LEPR    | PDGFB   | RPS6    | VEGFA   | DLL3     | DDX43    |          |
| CEBPA  | FOXP1   | ASS1    | DNMT1    | FLT4    | LYN     | PDGFRB  | RRM1    | VEGFC   | STAG3    | WDR12    |          |
| PRKACA | REL     | ATR     | DPYD     | FNTB    | TACSTD2 | ABCB1   | RRM2    | WEE1    | STAG2    | PBK      |          |
| DNMT3A | VHL     | ATRX    | DRD5     | FOS     | EPCAM   | PIM1    | SCN8A   | WNT11   | HSPH1    | POLE4    |          |
| EGFR   | BCL2    | AXL     | DUSP6    | MTOR    | MDM2    | PIK3R1  | CX3CL1  | XRCC1   | TLK2     | CIP2A    |          |
| ERBB2  | IGF2    | B2M     | EFNA2    | GAS6    | MDM4    | PIK3R2  | SDHA    | CXCR4   | PTPRT    | KMT2C    |          |
| ESR1   | AURKA   | BARD1   | EGF      | GATA1   | MEN1    | PLCG2   | SDHB    | DEK     | PTP4A3   | PAPPA2   |          |
| FGFR2  | PBRM1   | PRDM1   | EIF1AX   | B4GALT1 | MITF    | PLK1    | SRSF2   | HMGA2   | CHEK2    | PBLD     |          |
| FGFR3  | EZH2    | CALR    | EIF4EBP1 | GLI1    | MKI67   | PMS2    | SGK1    | LZTR1   | DKK1     | CRLF2    |          |
| FLT3   | KMT2D   | CASP8   | EP300    | GNA11   | MLH1    | POLD1   | SMARCB1 | ZRSR2   | NT5C2    | RBM15    |          |
| GATA2  | BTK     | CBFA2T3 | EPAS1    | GNAQ    | KMT2A   | POLE    | SMO     | KDM5C   | CIC      | BIRC7    |          |
| IDH1   | APC     | CBFB    | EPHB2    | GNAS    | MMP2    | POU5F1  | SOX10   | ARID1A  | DICER1   | PALB2    |          |
| IDH2   | AR      | CBL     | EPHB4    | GSTP1   | MMP9    | PRKAA2  | SSX1    | H3C2    | SIRT1    | PREX2    |          |
| JAK2   | ASXL1   | CBLB    | EPOR     | MSH6    | MN1     | PRKAR1A | SSX2    | IRS2    | BRD4     | PDCD1LG2 |          |
| KIT    | ATM     | CD44    | ERBB3    | H3-3A   | MPL     | PRKCB   | SSX4    | ABCC3   | CBLC     | NECTIN4  |          |
| KRAS   | BAP1    | CD79B   | ERBB4    | H3-3B   | MRE11   | MAPK1   | STAT1   | CFLAR   | PPP1R15A | CARD11   |          |
| MAP2K1 | ERG     | CDH1    | ERCC1    | HDAC2   | MSH2    | MAP2K2  | STAT3   | PROM1   | POT1     | HAVCR2   |          |
| MEF2D  | FOXL2   | CDK2    | ERCC2    | HGF     | MTAP    | MAP2K7  | STAT5B  | ALDH1A2 | WWTR1    | ABCC10   |          |
| CSF1R  | IKZF1   | CDK5    | EREG     | NRG1    | MTHFR   | PRPS1   | STAT6   | SPHK1   | SETBP1   | IL33     |          |
| MGMT   | NCOA3   | CDK9    | ERCC5    | HIF1A   | MYB     | PSMB8   | SULT1E1 | FUBP1   | PDCD4    | SLFN11   |          |
| NPM1   | PAX8    | CDKN1A  | ETS2     | HLA-C   | MYC     | PSMD4   | STK11   | MBD4    | MAGEH1   | RCSD1    |          |
| NRAS   | PGR     | CDKN1B  | ETV1     | HLA-DRA | MYCL    | PTCH1   | SYK     | PTTG1   | DROSHA   | NAPRT    |          |
| PIK3CA | SMAD4   | CDKN2B  | ETV4     | HMOX1   | MYCN    | PTGS2   | ZEB1    | ABCG2   | TBK1     | VPS37A   |          |
| PDGFRA | SMARCA4 | CDX2    | ETV5     | HOXD8   | MYD88   | PTPN6   | TEK     | KIF23   | CD274    | PXDNL    |          |
| PML    | TERT    | CHEK1   | ETV6     | HRAS    | MYOD1   | PTPN11  | NR2F2   | CUL7    | TLX3     | AMER1    |          |
| PTEN   | TTF1    | CREBBP  | MECOM    | HSPA5   | NBN     | PTPN12  | TFF3    | FGF19   | CTAG2    | DGKH     |          |

**Supplementary Table 6.** CIViV gene list. Genes that have been manually curated through literature based evidence and found to have clinical relevance to cancer in the CIViC knowledgebase.

| Gene    | Correlation  | p-value | Treatment         |
|---------|--------------|---------|-------------------|
| ABCB1   | -0.10037826  | 0.6184  | Olaparib 100mg/kg |
| ABCB1   | 0.072366866  | 0.6939  | Olaparib 50mg/kg  |
| ABCC10  | 0.244916119  | 0.2182  | Olaparib 100mg/kg |
| ABCC10  | 0.090973804  | 0.6205  | Olaparib 50mg/kg  |
| ABCC3   | 0.171434059  | 0.3926  | Olaparib 100mg/kg |
| ABCC3   | 0.258294089  | 0.1535  | Olaparib 50mg/kg  |
| ABCG2   | 0.087860296  | 0.6630  | Olaparib 100mg/kg |
| ABCG2   | 0.144784264  | 0.4292  | Olaparib 50mg/kg  |
| ABL1    | 0.038557546  | 0.8486  | Olaparib 100mg/kg |
| ABL1    | -0.046045393 | 0.8024  | Olaparib 50mg/kg  |
| ABL2    | 0.408874276  | 0.0342  | Olaparib 100mg/kg |
| ABL2    | 0.418876041  | 0.0170  | Olaparib 50mg/kg  |
| ACTA1   | -0.069476806 | 0.7306  | Olaparib 100mg/kg |
| ACTA1   | 0.008105166  | 0.9649  | Olaparib 50mg/kg  |
| ACTL6A  | 0.279473536  | 0.1580  | Olaparib 100mg/kg |
| ACTL6A  | 0.135117157  | 0.4609  | Olaparib 50mg/kg  |
| ACVR1   | 0.11314272   | 0.5742  | Olaparib 100mg/kg |
| ACVR1   | 0.033625328  | 0.8550  | Olaparib 50mg/kg  |
| AEBP1   | -0.213712084 | 0.2845  | Olaparib 100mg/kg |
| AEBP1   | -0.11656011  | 0.5252  | Olaparib 50mg/kg  |
| AGR2    | 0.062252398  | 0.7577  | Olaparib 100mg/kg |
| AGR2    | 0.053860569  | 0.7697  | Olaparib 50mg/kg  |
| AKT1    | 0.18771811   | 0.3484  | Olaparib 100mg/kg |
| AKT1    | 0.25280248   | 0.1627  | Olaparib 50mg/kg  |
| AKT2    | 0.26744799   | 0.1774  | Olaparib 100mg/kg |
| AKT2    | 0.061237019  | 0.7392  | Olaparib 50mg/kg  |
| AKT3    | 0.034554299  | 0.8641  | Olaparib 100mg/kg |
| AKT3    | -0.080723641 | 0.6605  | Olaparib 50mg/kg  |
| ALCAM   | -0.150460641 | 0.4538  | Olaparib 100mg/kg |
| ALCAM   | -0.242316054 | 0.1815  | Olaparib 50mg/kg  |
| ALDH1A2 | 0.002891127  | 0.9886  | Olaparib 100mg/kg |
| ALDH1A2 | -0.013362614 | 0.9421  | Olaparib 50mg/kg  |
| ALK     | -0.18920759  | 0.3446  | Olaparib 100mg/kg |

|        |              |        |                   |
|--------|--------------|--------|-------------------|
| ALK    | -0.321676164 | 0.0726 | Olaparib 50mg/kg  |
| AMER1  | 0.045485577  | 0.8218 | Olaparib 100mg/kg |
| AMER1  | -0.108730702 | 0.5536 | Olaparib 50mg/kg  |
| APC    | 0.156358531  | 0.4361 | Olaparib 100mg/kg |
| APC    | 0.200998561  | 0.2700 | Olaparib 50mg/kg  |
| AR     | 0.17966393   | 0.3699 | Olaparib 100mg/kg |
| AR     | 0.031890462  | 0.8624 | Olaparib 50mg/kg  |
| ARAF   | 0.024201872  | 0.9046 | Olaparib 100mg/kg |
| ARAF   | -0.139654754 | 0.4459 | Olaparib 50mg/kg  |
| AREG   | 0.12462526   | 0.5357 | Olaparib 100mg/kg |
| AREG   | 0.008311253  | 0.9640 | Olaparib 50mg/kg  |
| ARID1A | 0.173342602  | 0.3872 | Olaparib 100mg/kg |
| ARID1A | 0.201993475  | 0.2676 | Olaparib 50mg/kg  |
| ARID2  | 0.388633851  | 0.0451 | Olaparib 100mg/kg |
| ARID2  | 0.29219224   | 0.1046 | Olaparib 50mg/kg  |
| ASCL1  | -0.156511411 | 0.4356 | Olaparib 100mg/kg |
| ASCL1  | -0.154547322 | 0.3984 | Olaparib 50mg/kg  |
| ASNS   | 0.464906018  | 0.0146 | Olaparib 100mg/kg |
| ASNS   | 0.426267319  | 0.0150 | Olaparib 50mg/kg  |
| ASS1   | -0.073631996 | 0.7151 | Olaparib 100mg/kg |
| ASS1   | -0.076912848 | 0.6757 | Olaparib 50mg/kg  |
| ASXL1  | 0.146537457  | 0.4658 | Olaparib 100mg/kg |
| ASXL1  | 0.096046937  | 0.6010 | Olaparib 50mg/kg  |
| ATM    | 0.271891911  | 0.1701 | Olaparib 100mg/kg |
| ATM    | 0.172813066  | 0.3442 | Olaparib 50mg/kg  |
| ATR    | 0.469953678  | 0.0134 | Olaparib 100mg/kg |
| ATR    | 0.329802867  | 0.0653 | Olaparib 50mg/kg  |
| ATRX   | 0.254346621  | 0.2005 | Olaparib 100mg/kg |
| ATRX   | 0.229608308  | 0.2062 | Olaparib 50mg/kg  |
| ATXN1L | 0.09004587   | 0.6551 | Olaparib 100mg/kg |
| ATXN1L | 0.1047737    | 0.5682 | Olaparib 50mg/kg  |
| AURKA  | 0.445627762  | 0.0198 | Olaparib 100mg/kg |
| AURKA  | 0.331675548  | 0.0637 | Olaparib 50mg/kg  |
| AXL    | 0.114956662  | 0.5680 | Olaparib 100mg/kg |

|         |              |        |                   |
|---------|--------------|--------|-------------------|
| AXL     | 0.170264753  | 0.3515 | Olaparib 50mg/kg  |
| B2M     | -0.019660596 | 0.9225 | Olaparib 100mg/kg |
| B2M     | -0.113573228 | 0.5360 | Olaparib 50mg/kg  |
| B4GALT1 | 0.211901568  | 0.2887 | Olaparib 100mg/kg |
| B4GALT1 | 0.163248389  | 0.3720 | Olaparib 50mg/kg  |
| BAP1    | 0.168848714  | 0.3998 | Olaparib 100mg/kg |
| BAP1    | -0.010726082 | 0.9535 | Olaparib 50mg/kg  |
| BARD1   | 0.188700661  | 0.3459 | Olaparib 100mg/kg |
| BARD1   | 0.095047199  | 0.6048 | Olaparib 50mg/kg  |
| BCL2    | 0.424924613  | 0.0271 | Olaparib 100mg/kg |
| BCL2    | 0.289727115  | 0.1077 | Olaparib 50mg/kg  |
| BCL2L11 | 0.337645612  | 0.0850 | Olaparib 100mg/kg |
| BCL2L11 | 0.171214549  | 0.3488 | Olaparib 50mg/kg  |
| BCOR    | -0.031046454 | 0.8778 | Olaparib 100mg/kg |
| BCOR    | -0.007006121 | 0.9696 | Olaparib 50mg/kg  |
| BIRC3   | 0.296884914  | 0.1326 | Olaparib 100mg/kg |
| BIRC3   | 0.176744865  | 0.3332 | Olaparib 50mg/kg  |
| BIRC5   | 0.420865755  | 0.0288 | Olaparib 100mg/kg |
| BIRC5   | 0.249831998  | 0.1679 | Olaparib 50mg/kg  |
| BIRC7   | -0.131195674 | 0.5142 | Olaparib 100mg/kg |
| BIRC7   | -0.068048173 | 0.7113 | Olaparib 50mg/kg  |
| BRAF    | 0.300436855  | 0.1278 | Olaparib 100mg/kg |
| BRAF    | 0.113471627  | 0.5363 | Olaparib 50mg/kg  |
| BRCA1   | 0.415524603  | 0.0311 | Olaparib 100mg/kg |
| BRCA1   | 0.280245813  | 0.1203 | Olaparib 50mg/kg  |
| BRCA2   | 0.516367911  | 0.0058 | Olaparib 100mg/kg |
| BRCA2   | 0.371208469  | 0.0365 | Olaparib 50mg/kg  |
| BRD4    | 0.160342722  | 0.4243 | Olaparib 100mg/kg |
| BRD4    | 0.183375552  | 0.3151 | Olaparib 50mg/kg  |
| BTK     | 0.291298092  | 0.1404 | Olaparib 100mg/kg |
| BTK     | 0.256136564  | 0.1571 | Olaparib 50mg/kg  |
| CALR    | 0.102659693  | 0.6104 | Olaparib 100mg/kg |
| CALR    | 0.060871439  | 0.7407 | Olaparib 50mg/kg  |
| CARD11  | 0.085506419  | 0.6715 | Olaparib 100mg/kg |



|         |              |        |                   |
|---------|--------------|--------|-------------------|
| CARD11  | 0.159318851  | 0.3838 | Olaparib 50mg/kg  |
| CASP8   | 0.115421655  | 0.5664 | Olaparib 100mg/kg |
| CASP8   | -0.097618453 | 0.5951 | Olaparib 50mg/kg  |
| CBFA2T3 | 0.035613167  | 0.8600 | Olaparib 100mg/kg |
| CBFA2T3 | 0.091240854  | 0.6194 | Olaparib 50mg/kg  |
| CBFB    | 0.228859049  | 0.2509 | Olaparib 100mg/kg |
| CBFB    | 0.220587513  | 0.2251 | Olaparib 50mg/kg  |
| CBL     | 0.35298467   | 0.0709 | Olaparib 100mg/kg |
| CBL     | 0.265060965  | 0.1426 | Olaparib 50mg/kg  |
| CBLB    | 0.246110431  | 0.2159 | Olaparib 100mg/kg |
| CBLB    | 0.176931771  | 0.3327 | Olaparib 50mg/kg  |
| CBLC    | 0.134656824  | 0.5031 | Olaparib 100mg/kg |
| CBLC    | 0.13669136   | 0.4557 | Olaparib 50mg/kg  |
| CCND1   | 0.255935539  | 0.1976 | Olaparib 100mg/kg |
| CCND1   | 0.091252872  | 0.6194 | Olaparib 50mg/kg  |
| CCND2   | 0.270140467  | 0.1730 | Olaparib 100mg/kg |
| CCND2   | 0.192200537  | 0.2919 | Olaparib 50mg/kg  |
| CCND3   | -0.148412323 | 0.4600 | Olaparib 100mg/kg |
| CCND3   | -0.058972069 | 0.7485 | Olaparib 50mg/kg  |
| CCNE1   | 0.373633155  | 0.0549 | Olaparib 100mg/kg |
| CCNE1   | 0.315183105  | 0.0789 | Olaparib 50mg/kg  |
| CD274   | 0.155244591  | 0.4394 | Olaparib 100mg/kg |
| CD274   | -0.007707929 | 0.9666 | Olaparib 50mg/kg  |
| CD44    | 0.244586988  | 0.2189 | Olaparib 100mg/kg |
| CD44    | 0.198235133  | 0.2768 | Olaparib 50mg/kg  |
| CD79B   | -0.037631434 | 0.8522 | Olaparib 100mg/kg |
| CD79B   | -0.082371245 | 0.6540 | Olaparib 50mg/kg  |
| CDH1    | 0.202462225  | 0.3112 | Olaparib 100mg/kg |
| CDH1    | 0.040586857  | 0.8254 | Olaparib 50mg/kg  |
| CDK12   | 0.218404992  | 0.2738 | Olaparib 100mg/kg |
| CDK12   | 0.236947072  | 0.1916 | Olaparib 50mg/kg  |
| CDK2    | 0.022354138  | 0.9119 | Olaparib 100mg/kg |
| CDK2    | -0.046918732 | 0.7987 | Olaparib 50mg/kg  |
| CDK4    | 0.166546487  | 0.4064 | Olaparib 100mg/kg |

|        |              |        |                   |
|--------|--------------|--------|-------------------|
| CDK4   | -0.070538438 | 0.7013 | Olaparib 50mg/kg  |
| CDK5   | 0.125064193  | 0.5342 | Olaparib 100mg/kg |
| CDK5   | -0.005549125 | 0.9760 | Olaparib 50mg/kg  |
| CDK6   | 0.421397443  | 0.0286 | Olaparib 100mg/kg |
| CDK6   | 0.295878725  | 0.1001 | Olaparib 50mg/kg  |
| CDK9   | 0.135427821  | 0.5006 | Olaparib 100mg/kg |
| CDK9   | 0.044768775  | 0.8078 | Olaparib 50mg/kg  |
| CDKN1A | 0.079242074  | 0.6944 | Olaparib 100mg/kg |
| CDKN1A | 0.114947088  | 0.5310 | Olaparib 50mg/kg  |
| CDKN1B | 0.280502283  | 0.1564 | Olaparib 100mg/kg |
| CDKN1B | 0.135520838  | 0.4596 | Olaparib 50mg/kg  |
| CDKN2A | -0.311759883 | 0.1134 | Olaparib 100mg/kg |
| CDKN2A | -0.074286513 | 0.6862 | Olaparib 50mg/kg  |
| CDKN2B | -0.206488535 | 0.3014 | Olaparib 100mg/kg |
| CDKN2B | 0.000648753  | 0.9972 | Olaparib 50mg/kg  |
| CDX2   | 0.143241652  | 0.4760 | Olaparib 100mg/kg |
| CDX2   | 0.151517643  | 0.4078 | Olaparib 50mg/kg  |
| CEBPA  | 0.094731384  | 0.6384 | Olaparib 100mg/kg |
| CEBPA  | 0.087472097  | 0.6340 | Olaparib 50mg/kg  |
| CFLAR  | 0.253574155  | 0.2019 | Olaparib 100mg/kg |
| CFLAR  | 0.099832238  | 0.5867 | Olaparib 50mg/kg  |
| CHEK1  | 0.380987478  | 0.0499 | Olaparib 100mg/kg |
| CHEK1  | 0.352169431  | 0.0481 | Olaparib 50mg/kg  |
| CHEK2  | 0.433872836  | 0.0238 | Olaparib 100mg/kg |
| CHEK2  | 0.298319885  | 0.0972 | Olaparib 50mg/kg  |
| CIC    | -0.019737319 | 0.9222 | Olaparib 100mg/kg |
| CIC    | -0.018902427 | 0.9182 | Olaparib 50mg/kg  |
| CRBN   | 0.265293497  | 0.1811 | Olaparib 100mg/kg |
| CRBN   | 0.090598715  | 0.6219 | Olaparib 50mg/kg  |
| CREBBP | 0.096140416  | 0.6333 | Olaparib 100mg/kg |
| CREBBP | 0.077240195  | 0.6744 | Olaparib 50mg/kg  |
| CRKL   | 0.107742628  | 0.5927 | Olaparib 100mg/kg |
| CRKL   | 0.038120873  | 0.8359 | Olaparib 50mg/kg  |
| CRLF2  | 0.311638297  | 0.1136 | Olaparib 100mg/kg |

|        |              |        |                   |
|--------|--------------|--------|-------------------|
| CRLF2  | 0.276024657  | 0.1262 | Olaparib 50mg/kg  |
| CSF1   | 0.07416627   | 0.7131 | Olaparib 100mg/kg |
| CSF1   | -0.110517388 | 0.5471 | Olaparib 50mg/kg  |
| CSF1R  | -0.030133172 | 0.8814 | Olaparib 100mg/kg |
| CSF1R  | -0.03952167  | 0.8300 | Olaparib 50mg/kg  |
| CSF3R  | -0.164250924 | 0.4130 | Olaparib 100mg/kg |
| CSF3R  | 0.05659527   | 0.7583 | Olaparib 50mg/kg  |
| CTAG1B | -0.358963495 | 0.0659 | Olaparib 100mg/kg |
| CTAG1B | -0.458765215 | 0.0083 | Olaparib 50mg/kg  |
| CTAG2  | -0.320709924 | 0.1029 | Olaparib 100mg/kg |
| CTAG2  | -0.140977865 | 0.4415 | Olaparib 50mg/kg  |
| CTLA4  | -0.016587224 | 0.9346 | Olaparib 100mg/kg |
| CTLA4  | 0.05827336   | 0.7514 | Olaparib 50mg/kg  |
| CTNNB1 | 0.353575833  | 0.0704 | Olaparib 100mg/kg |
| CTNNB1 | 0.221341491  | 0.2234 | Olaparib 50mg/kg  |
| CUL7   | 0.126647845  | 0.5290 | Olaparib 100mg/kg |
| CUL7   | 0.198334986  | 0.2765 | Olaparib 50mg/kg  |
| CX3CL1 | -0.102736916 | 0.6101 | Olaparib 100mg/kg |
| CX3CL1 | -0.082537172 | 0.6534 | Olaparib 50mg/kg  |
| CXCL10 | 0.114166351  | 0.5707 | Olaparib 100mg/kg |
| CXCL10 | 0.08938852   | 0.6266 | Olaparib 50mg/kg  |
| CXCR4  | 0.212251653  | 0.2878 | Olaparib 100mg/kg |
| CXCR4  | 0.038247144  | 0.8354 | Olaparib 50mg/kg  |
| CYP2D6 | 0.238361383  | 0.2312 | Olaparib 100mg/kg |
| CYP2D6 | 0.162428399  | 0.3744 | Olaparib 50mg/kg  |
| DBI    | 0.045784111  | 0.8206 | Olaparib 100mg/kg |
| DBI    | 0.019388092  | 0.9161 | Olaparib 50mg/kg  |
| DCC    | -0.127458414 | 0.5264 | Olaparib 100mg/kg |
| DCC    | -0.10231448  | 0.5774 | Olaparib 50mg/kg  |
| DDIT3  | 0.171617937  | 0.3920 | Olaparib 100mg/kg |
| DDIT3  | -0.032535552 | 0.8597 | Olaparib 50mg/kg  |
| DDR2   | -0.038391516 | 0.8492 | Olaparib 100mg/kg |
| DDR2   | -0.188126839 | 0.3025 | Olaparib 50mg/kg  |
| DDX41  | 0.305696627  | 0.1210 | Olaparib 100mg/kg |

|        |              |        |                   |
|--------|--------------|--------|-------------------|
| DDX41  | 0.255652736  | 0.1579 | Olaparib 50mg/kg  |
| DDX43  | 0.133517601  | 0.5067 | Olaparib 100mg/kg |
| DDX43  | 0.244066264  | 0.1782 | Olaparib 50mg/kg  |
| DEFA1  | 0.19400675   | 0.3322 | Olaparib 100mg/kg |
| DEFA1  | 0.04258554   | 0.8170 | Olaparib 50mg/kg  |
| DEK    | 0.404286894  | 0.0365 | Olaparib 100mg/kg |
| DEK    | 0.343785872  | 0.0540 | Olaparib 50mg/kg  |
| DGKH   | 0.279472843  | 0.1580 | Olaparib 100mg/kg |
| DGKH   | 0.199867235  | 0.2728 | Olaparib 50mg/kg  |
| DICER1 | 0.314915656  | 0.1096 | Olaparib 100mg/kg |
| DICER1 | 0.164738986  | 0.3676 | Olaparib 50mg/kg  |
| DKK1   | 0.366497568  | 0.0601 | Olaparib 100mg/kg |
| DKK1   | 0.289031478  | 0.1086 | Olaparib 50mg/kg  |
| DLL3   | 0.005784922  | 0.9772 | Olaparib 100mg/kg |
| DLL3   | 0.063237575  | 0.7310 | Olaparib 50mg/kg  |
| DNMT1  | 0.485664941  | 0.0102 | Olaparib 100mg/kg |
| DNMT1  | 0.421166615  | 0.0164 | Olaparib 50mg/kg  |
| DNMT3A | -0.08324264  | 0.6798 | Olaparib 100mg/kg |
| DNMT3A | -0.173494865 | 0.3423 | Olaparib 50mg/kg  |
| DPYD   | 0.088733386  | 0.6598 | Olaparib 100mg/kg |
| DPYD   | 0.047149894  | 0.7978 | Olaparib 50mg/kg  |
| DRD5   | 0.01011035   | 0.9601 | Olaparib 100mg/kg |
| DRD5   | 0.085668999  | 0.6411 | Olaparib 50mg/kg  |
| DROSHA | 0.320063817  | 0.1036 | Olaparib 100mg/kg |
| DROSHA | 0.206536618  | 0.2567 | Olaparib 50mg/kg  |
| DUSP6  | 0.098916167  | 0.6235 | Olaparib 100mg/kg |
| DUSP6  | 0.029489768  | 0.8727 | Olaparib 50mg/kg  |
| DUX4   | -0.107234879 | 0.5945 | Olaparib 100mg/kg |
| DUX4   | -0.074858388 | 0.6839 | Olaparib 50mg/kg  |
| ECSCR  | 0.144923537  | 0.4708 | Olaparib 100mg/kg |
| ECSCR  | 0.16391635   | 0.3700 | Olaparib 50mg/kg  |
| EFNA2  | -0.156590958 | 0.4354 | Olaparib 100mg/kg |
| EFNA2  | -0.009028008 | 0.9609 | Olaparib 50mg/kg  |
| EGF    | -0.151340199 | 0.4511 | Olaparib 100mg/kg |

|          |              |        |                   |
|----------|--------------|--------|-------------------|
| EGF      | -0.097667272 | 0.5949 | Olaparib 50mg/kg  |
| EGFR     | 0.112388513  | 0.5768 | Olaparib 100mg/kg |
| EGFR     | 0.091974661  | 0.6166 | Olaparib 50mg/kg  |
| EIF1AX   | 0.130385677  | 0.5168 | Olaparib 100mg/kg |
| EIF1AX   | 0.007325892  | 0.9683 | Olaparib 50mg/kg  |
| EIF4EBP1 | 0.18888684   | 0.3454 | Olaparib 100mg/kg |
| EIF4EBP1 | 0.153842525  | 0.4005 | Olaparib 50mg/kg  |
| EP300    | 0.328607471  | 0.0942 | Olaparib 100mg/kg |
| EP300    | 0.297407742  | 0.0983 | Olaparib 50mg/kg  |
| EPAS1    | 0.00511244   | 0.9798 | Olaparib 100mg/kg |
| EPAS1    | -0.025697818 | 0.8890 | Olaparib 50mg/kg  |
| EPCAM    | 0.183737221  | 0.3589 | Olaparib 100mg/kg |
| EPCAM    | 0.108359924  | 0.5550 | Olaparib 50mg/kg  |
| EPHB2    | 0.030594227  | 0.8796 | Olaparib 100mg/kg |
| EPHB2    | 0.010074397  | 0.9564 | Olaparib 50mg/kg  |
| EPHB4    | 0.198634958  | 0.3206 | Olaparib 100mg/kg |
| EPHB4    | 0.301930534  | 0.0931 | Olaparib 50mg/kg  |
| EPOR     | 0.076163369  | 0.7057 | Olaparib 100mg/kg |
| EPOR     | 0.046944518  | 0.7986 | Olaparib 50mg/kg  |
| ERBB2    | 0.089513102  | 0.6570 | Olaparib 100mg/kg |
| ERBB2    | 0.085309156  | 0.6425 | Olaparib 50mg/kg  |
| ERBB3    | 0.122225193  | 0.5436 | Olaparib 100mg/kg |
| ERBB3    | 0.076405016  | 0.6777 | Olaparib 50mg/kg  |
| ERBB4    | -0.16065963  | 0.4234 | Olaparib 100mg/kg |
| ERBB4    | -0.145876786 | 0.4257 | Olaparib 50mg/kg  |
| ERCC1    | -0.003181869 | 0.9874 | Olaparib 100mg/kg |
| ERCC1    | 0.036869324  | 0.8412 | Olaparib 50mg/kg  |
| ERCC2    | 0.265989553  | 0.1799 | Olaparib 100mg/kg |
| ERCC2    | 0.252403345  | 0.1634 | Olaparib 50mg/kg  |
| ERCC5    | 0.429052275  | 0.0255 | Olaparib 100mg/kg |
| ERCC5    | 0.353448167  | 0.0472 | Olaparib 50mg/kg  |
| EREG     | 0.262054473  | 0.1867 | Olaparib 100mg/kg |
| EREG     | 0.194079135  | 0.2872 | Olaparib 50mg/kg  |
| ERG      | 0.0390817    | 0.8465 | Olaparib 100mg/kg |

|        |              |        |                   |
|--------|--------------|--------|-------------------|
| ERG    | 0.154869827  | 0.3974 | Olaparib 50mg/kg  |
| ERRFI1 | 0.281410991  | 0.1550 | Olaparib 100mg/kg |
| ERRFI1 | 0.197051446  | 0.2797 | Olaparib 50mg/kg  |
| ESR1   | 0.006529643  | 0.9742 | Olaparib 100mg/kg |
| ESR1   | -0.015902088 | 0.9312 | Olaparib 50mg/kg  |
| ETS2   | 0.294420088  | 0.1360 | Olaparib 100mg/kg |
| ETS2   | 0.221453261  | 0.2232 | Olaparib 50mg/kg  |
| ETV1   | -0.058459415 | 0.7721 | Olaparib 100mg/kg |
| ETV1   | -0.171322901 | 0.3485 | Olaparib 50mg/kg  |
| ETV4   | 0.240320422  | 0.2273 | Olaparib 100mg/kg |
| ETV4   | -0.015783396 | 0.9317 | Olaparib 50mg/kg  |
| ETV5   | 0.195407031  | 0.3287 | Olaparib 100mg/kg |
| ETV5   | 0.023676362  | 0.8977 | Olaparib 50mg/kg  |
| ETV6   | 0.376273651  | 0.0531 | Olaparib 100mg/kg |
| ETV6   | 0.140712164  | 0.4424 | Olaparib 50mg/kg  |
| EWSR1  | 0.369766075  | 0.0576 | Olaparib 100mg/kg |
| EWSR1  | 0.281964897  | 0.1179 | Olaparib 50mg/kg  |
| EZH2   | 0.040807131  | 0.8398 | Olaparib 100mg/kg |
| EZH2   | -0.060562976 | 0.7420 | Olaparib 50mg/kg  |
| FANCA  | 0.230540578  | 0.2473 | Olaparib 100mg/kg |
| FANCA  | 0.195978582  | 0.2824 | Olaparib 50mg/kg  |
| FANCC  | 0.087321281  | 0.6649 | Olaparib 100mg/kg |
| FANCC  | 0.161003721  | 0.3787 | Olaparib 50mg/kg  |
| FBXW7  | 0.303385325  | 0.1240 | Olaparib 100mg/kg |
| FBXW7  | 0.209966689  | 0.2487 | Olaparib 50mg/kg  |
| FCGR2A | 0.180896792  | 0.3665 | Olaparib 100mg/kg |
| FCGR2A | 0.211943106  | 0.2442 | Olaparib 50mg/kg  |
| FCGR2B | 0.28123985   | 0.1553 | Olaparib 100mg/kg |
| FCGR2B | 0.229299014  | 0.2068 | Olaparib 50mg/kg  |
| FCGR3A | -0.049184465 | 0.8075 | Olaparib 100mg/kg |
| FCGR3A | -0.076308404 | 0.6781 | Olaparib 50mg/kg  |
| FGF13  | -0.095866606 | 0.6343 | Olaparib 100mg/kg |
| FGF13  | -0.079786284 | 0.6642 | Olaparib 50mg/kg  |
| FGF19  | 0.288412721  | 0.1446 | Olaparib 100mg/kg |

|       |              |        |                   |
|-------|--------------|--------|-------------------|
| FGF19 | 0.216572201  | 0.2338 | Olaparib 50mg/kg  |
| FGF2  | 0.248272036  | 0.2118 | Olaparib 100mg/kg |
| FGF2  | 0.152825531  | 0.4037 | Olaparib 50mg/kg  |
| FGF3  | 0.181273348  | 0.3655 | Olaparib 100mg/kg |
| FGF3  | 0.131759098  | 0.4722 | Olaparib 50mg/kg  |
| FGFR1 | 0.036082192  | 0.8582 | Olaparib 100mg/kg |
| FGFR1 | 0.092292476  | 0.6154 | Olaparib 50mg/kg  |
| FGFR2 | -0.102617256 | 0.6105 | Olaparib 100mg/kg |
| FGFR2 | -0.132210533 | 0.4707 | Olaparib 50mg/kg  |
| FGFR3 | -0.171277367 | 0.3930 | Olaparib 100mg/kg |
| FGFR3 | -0.07816033  | 0.6707 | Olaparib 50mg/kg  |
| FGFR4 | 0.142836731  | 0.4772 | Olaparib 100mg/kg |
| FGFR4 | 0.172628437  | 0.3448 | Olaparib 50mg/kg  |
| FLCN  | 0.217078907  | 0.2768 | Olaparib 100mg/kg |
| FLCN  | 0.251963766  | 0.1642 | Olaparib 50mg/kg  |
| FLI1  | -0.155299321 | 0.4392 | Olaparib 100mg/kg |
| FLI1  | -0.002521884 | 0.9891 | Olaparib 50mg/kg  |
| FLT3  | -0.073153227 | 0.7169 | Olaparib 100mg/kg |
| FLT3  | -0.070424443 | 0.7017 | Olaparib 50mg/kg  |
| FLT4  | 0.268281505  | 0.1760 | Olaparib 100mg/kg |
| FLT4  | 0.234458488  | 0.1965 | Olaparib 50mg/kg  |
| FNTB  | 0.275024312  | 0.1650 | Olaparib 100mg/kg |
| FNTB  | 0.226122086  | 0.2133 | Olaparib 50mg/kg  |
| FOS   | 0.033270377  | 0.8691 | Olaparib 100mg/kg |
| FOS   | 0.083947768  | 0.6478 | Olaparib 50mg/kg  |
| FOXC2 | 0.165713709  | 0.4088 | Olaparib 100mg/kg |
| FOXC2 | 0.295633078  | 0.1004 | Olaparib 50mg/kg  |
| FOXL2 | 0.060554072  | 0.7642 | Olaparib 100mg/kg |
| FOXL2 | 0.180410797  | 0.3231 | Olaparib 50mg/kg  |
| FOXO1 | 0.041837341  | 0.8359 | Olaparib 100mg/kg |
| FOXO1 | 0.009643617  | 0.9582 | Olaparib 50mg/kg  |
| FOXO3 | 0.171910847  | 0.3912 | Olaparib 100mg/kg |
| FOXO3 | 0.290181054  | 0.1072 | Olaparib 50mg/kg  |
| FOXP1 | 0.198273967  | 0.3215 | Olaparib 100mg/kg |

|         |              |        |                   |
|---------|--------------|--------|-------------------|
| FOXP1   | 0.082712359  | 0.6527 | Olaparib 50mg/kg  |
| FOXP3   | 4.5665E-05   | 0.9998 | Olaparib 100mg/kg |
| FOXP3   | 0.221288144  | 0.2235 | Olaparib 50mg/kg  |
| FUBP1   | 0.528181075  | 0.0046 | Olaparib 100mg/kg |
| FUBP1   | 0.405279431  | 0.0214 | Olaparib 50mg/kg  |
| GADD45A | 0.100790831  | 0.6169 | Olaparib 100mg/kg |
| GADD45A | 0.060776328  | 0.7411 | Olaparib 50mg/kg  |
| GAS6    | -0.077391293 | 0.7012 | Olaparib 100mg/kg |
| GAS6    | -0.045051163 | 0.8066 | Olaparib 50mg/kg  |
| GATA1   | -0.142824216 | 0.4773 | Olaparib 100mg/kg |
| GATA1   | 0.008952375  | 0.9612 | Olaparib 50mg/kg  |
| GATA2   | -0.061251451 | 0.7615 | Olaparib 100mg/kg |
| GATA2   | 0.099317795  | 0.5886 | Olaparib 50mg/kg  |
| GLI1    | 0.072979775  | 0.7175 | Olaparib 100mg/kg |
| GLI1    | 0.100463138  | 0.5843 | Olaparib 50mg/kg  |
| GNA11   | 0.056009252  | 0.7814 | Olaparib 100mg/kg |
| GNA11   | 0.111045129  | 0.5451 | Olaparib 50mg/kg  |
| GNAQ    | 0.239681854  | 0.2285 | Olaparib 100mg/kg |
| GNAQ    | 0.078186355  | 0.6706 | Olaparib 50mg/kg  |
| GNAS    | 0.285696039  | 0.1486 | Olaparib 100mg/kg |
| GNAS    | 0.313518056  | 0.0806 | Olaparib 50mg/kg  |
| GSTP1   | 0.29839351   | 0.1306 | Olaparib 100mg/kg |
| GSTP1   | 0.073079229  | 0.6910 | Olaparib 50mg/kg  |
| HAVCR2  | -0.016632262 | 0.9344 | Olaparib 100mg/kg |
| HAVCR2  | 0.032952231  | 0.8579 | Olaparib 50mg/kg  |
| HDAC2   | 0.189220701  | 0.3445 | Olaparib 100mg/kg |
| HDAC2   | 0.215520825  | 0.2362 | Olaparib 50mg/kg  |
| HGF     | -0.279610616 | 0.1578 | Olaparib 100mg/kg |
| HGF     | -0.02726602  | 0.8822 | Olaparib 50mg/kg  |
| HIF1A   | 0.142643019  | 0.4779 | Olaparib 100mg/kg |
| HIF1A   | 0.121018194  | 0.5094 | Olaparib 50mg/kg  |
| HMGA2   | 0.088292997  | 0.6614 | Olaparib 100mg/kg |
| HMGA2   | 0.177741075  | 0.3304 | Olaparib 50mg/kg  |
| HMOX1   | -0.019264679 | 0.9240 | Olaparib 100mg/kg |



|        |              |        |                   |
|--------|--------------|--------|-------------------|
| HMOX1  | -0.096153625 | 0.6006 | Olaparib 50mg/kg  |
| HOXB13 | 0.101839432  | 0.6132 | Olaparib 100mg/kg |
| HOXB13 | 0.10868316   | 0.5538 | Olaparib 50mg/kg  |
| HOXD8  | -0.214333847 | 0.2830 | Olaparib 100mg/kg |
| HOXD8  | -0.079741815 | 0.6644 | Olaparib 50mg/kg  |
| HRAS   | 0.022210221  | 0.9124 | Olaparib 100mg/kg |
| HRAS   | 0.058339371  | 0.7511 | Olaparib 50mg/kg  |
| HSPA5  | 0.057839769  | 0.7744 | Olaparib 100mg/kg |
| HSPA5  | -0.091438887 | 0.6187 | Olaparib 50mg/kg  |
| HSPB1  | 0.038776846  | 0.8477 | Olaparib 100mg/kg |
| HSPB1  | 0.083575879  | 0.6493 | Olaparib 50mg/kg  |
| HSPH1  | 0.293033836  | 0.1380 | Olaparib 100mg/kg |
| HSPH1  | 0.178542205  | 0.3282 | Olaparib 50mg/kg  |
| IDH1   | 0.201714495  | 0.3130 | Olaparib 100mg/kg |
| IDH1   | 0.117016909  | 0.5236 | Olaparib 50mg/kg  |
| IDH2   | 0.174684932  | 0.3835 | Olaparib 100mg/kg |
| IDH2   | 0.026345169  | 0.8862 | Olaparib 50mg/kg  |
| IGF1R  | 0.128936535  | 0.5216 | Olaparib 100mg/kg |
| IGF1R  | 0.141218907  | 0.4407 | Olaparib 50mg/kg  |
| IGF2   | -0.019442995 | 0.9233 | Olaparib 100mg/kg |
| IGF2   | 0.117336752  | 0.5225 | Olaparib 50mg/kg  |
| IKZF1  | -0.156789168 | 0.4348 | Olaparib 100mg/kg |
| IKZF1  | 0.11464315   | 0.5321 | Olaparib 50mg/kg  |
| IL2RB  | -0.005170284 | 0.9796 | Olaparib 100mg/kg |
| IL2RB  | 0.022562469  | 0.9024 | Olaparib 50mg/kg  |
| IL33   | 0.330918278  | 0.0918 | Olaparib 100mg/kg |
| IL33   | 0.268456411  | 0.1374 | Olaparib 50mg/kg  |
| IL6    | 0.215254884  | 0.2809 | Olaparib 100mg/kg |
| IL6    | 0.141492394  | 0.4398 | Olaparib 50mg/kg  |
| IL7R   | 0.053828655  | 0.7897 | Olaparib 100mg/kg |
| IL7R   | -0.007001231 | 0.9697 | Olaparib 50mg/kg  |
| IRS2   | 0.337471816  | 0.0852 | Olaparib 100mg/kg |
| IRS2   | 0.281295856  | 0.1188 | Olaparib 50mg/kg  |
| JAK1   | 0.257359473  | 0.1950 | Olaparib 100mg/kg |

|       |              |        |                   |
|-------|--------------|--------|-------------------|
| JAK1  | 0.127634098  | 0.4863 | Olaparib 50mg/kg  |
| JAK2  | 0.102623014  | 0.6105 | Olaparib 100mg/kg |
| JAK2  | 0.025941522  | 0.8879 | Olaparib 50mg/kg  |
| JAK3  | 0.276512241  | 0.1627 | Olaparib 100mg/kg |
| JAK3  | 0.307056239  | 0.0874 | Olaparib 50mg/kg  |
| JUN   | 0.08538532   | 0.6720 | Olaparib 100mg/kg |
| JUN   | -0.01495402  | 0.9353 | Olaparib 50mg/kg  |
| KDM5C | 0.006208938  | 0.9755 | Olaparib 100mg/kg |
| KDM5C | -0.001274756 | 0.9945 | Olaparib 50mg/kg  |
| KDM6A | 0.278840432  | 0.1590 | Olaparib 100mg/kg |
| KDM6A | 0.315908374  | 0.0782 | Olaparib 50mg/kg  |
| KDR   | -0.0852974   | 0.6723 | Olaparib 100mg/kg |
| KDR   | 0.067621998  | 0.7131 | Olaparib 50mg/kg  |
| KIF23 | 0.519880067  | 0.0054 | Olaparib 100mg/kg |
| KIF23 | 0.368637592  | 0.0379 | Olaparib 50mg/kg  |
| KIT   | 0.148915188  | 0.4585 | Olaparib 100mg/kg |
| KIT   | 0.00189762   | 0.9918 | Olaparib 50mg/kg  |
| KLLN  | 0.158318035  | 0.4303 | Olaparib 100mg/kg |
| KLLN  | -0.046206904 | 0.8017 | Olaparib 50mg/kg  |
| KMT2A | 0.279170508  | 0.1585 | Olaparib 100mg/kg |
| KMT2A | 0.233683817  | 0.1980 | Olaparib 50mg/kg  |
| KMT2C | 0.188807567  | 0.3456 | Olaparib 100mg/kg |
| KMT2C | 0.138661074  | 0.4491 | Olaparib 50mg/kg  |
| KMT2D | 0.172715764  | 0.3890 | Olaparib 100mg/kg |
| KMT2D | 0.072170362  | 0.6947 | Olaparib 50mg/kg  |
| KRAS  | 0.377052208  | 0.0525 | Olaparib 100mg/kg |
| KRAS  | 0.222929554  | 0.2200 | Olaparib 50mg/kg  |
| KRT18 | 0.093006127  | 0.6445 | Olaparib 100mg/kg |
| KRT18 | 0.089851122  | 0.6248 | Olaparib 50mg/kg  |
| LAG3  | 0.239035191  | 0.2298 | Olaparib 100mg/kg |
| LAG3  | 0.173757728  | 0.3416 | Olaparib 50mg/kg  |
| LEPR  | 0.413697771  | 0.0319 | Olaparib 100mg/kg |
| LEPR  | 0.564201021  | 0.0008 | Olaparib 50mg/kg  |
| LRP1B | 0.256882046  | 0.1958 | Olaparib 100mg/kg |

|        |              |        |                   |
|--------|--------------|--------|-------------------|
| LRP1B  | 0.076006461  | 0.6793 | Olaparib 50mg/kg  |
| LYN    | 0.123235902  | 0.5403 | Olaparib 100mg/kg |
| LYN    | -0.039796105 | 0.8288 | Olaparib 50mg/kg  |
| LZTR1  | 0.002571339  | 0.9898 | Olaparib 100mg/kg |
| LZTR1  | -0.074936335 | 0.6836 | Olaparib 50mg/kg  |
| NBN    | 0.454911476  | 0.0171 | Olaparib 100mg/kg |
| NBN    | 0.367143813  | 0.0387 | Olaparib 50mg/kg  |
| NCOA2  | 0.405264385  | 0.0360 | Olaparib 100mg/kg |
| NCOA2  | 0.345932457  | 0.0525 | Olaparib 50mg/kg  |
| NCOA3  | 0.214076511  | 0.2836 | Olaparib 100mg/kg |
| NCOA3  | 0.360073475  | 0.0429 | Olaparib 50mg/kg  |
| NEDD9  | 0.104747198  | 0.6031 | Olaparib 100mg/kg |
| NEDD9  | 0.117803866  | 0.5208 | Olaparib 50mg/kg  |
| NF1    | 0.333487919  | 0.0891 | Olaparib 100mg/kg |
| NF1    | 0.305852839  | 0.0887 | Olaparib 50mg/kg  |
| NF2    | -0.034499811 | 0.8644 | Olaparib 100mg/kg |
| NF2    | -0.034548427 | 0.8511 | Olaparib 50mg/kg  |
| NFE2L2 | 0.484642146  | 0.0104 | Olaparib 100mg/kg |
| NFE2L2 | 0.255714244  | 0.1578 | Olaparib 50mg/kg  |
| NOTCH1 | 0.056254337  | 0.7805 | Olaparib 100mg/kg |
| NOTCH1 | 0.031165755  | 0.8655 | Olaparib 50mg/kg  |
| NOTCH3 | 0.156761314  | 0.4349 | Olaparib 100mg/kg |
| NOTCH3 | 0.083003738  | 0.6515 | Olaparib 50mg/kg  |
| NPM1   | 0.280029182  | 0.1572 | Olaparib 100mg/kg |
| NPM1   | 0.260207103  | 0.1503 | Olaparib 50mg/kg  |
| NQO1   | 0.161543605  | 0.4208 | Olaparib 100mg/kg |
| NQO1   | -0.020932159 | 0.9095 | Olaparib 50mg/kg  |
| NR2F2  | -0.030907192 | 0.8784 | Olaparib 100mg/kg |
| NR2F2  | -0.270463016 | 0.1344 | Olaparib 50mg/kg  |
| NRAS   | 0.191847818  | 0.3377 | Olaparib 100mg/kg |
| NRAS   | -0.04921129  | 0.7891 | Olaparib 50mg/kg  |
| NRG1   | -0.066814537 | 0.7406 | Olaparib 100mg/kg |
| NRG1   | -0.294208741 | 0.1022 | Olaparib 50mg/kg  |
| NT5C2  | 0.313652664  | 0.1111 | Olaparib 100mg/kg |

|          |              |        |                   |
|----------|--------------|--------|-------------------|
| NT5C2    | 0.237694226  | 0.1902 | Olaparib 50mg/kg  |
| NT5E     | -0.105741304 | 0.5996 | Olaparib 100mg/kg |
| NT5E     | -0.019848482 | 0.9141 | Olaparib 50mg/kg  |
| NTRK1    | -0.080682607 | 0.6891 | Olaparib 100mg/kg |
| NTRK1    | -0.003823663 | 0.9834 | Olaparib 50mg/kg  |
| NTRK2    | 0.193477563  | 0.3336 | Olaparib 100mg/kg |
| NTRK2    | 0.112990568  | 0.5381 | Olaparib 50mg/kg  |
| NTRK3    | 0.201235954  | 0.3142 | Olaparib 100mg/kg |
| NTRK3    | 0.147787413  | 0.4196 | Olaparib 50mg/kg  |
| NUDT15   | 0.478406026  | 0.0116 | Olaparib 100mg/kg |
| NUDT15   | 0.200331498  | 0.2716 | Olaparib 50mg/kg  |
| NUP98    | 0.501720951  | 0.0077 | Olaparib 100mg/kg |
| NUP98    | 0.361552497  | 0.0420 | Olaparib 50mg/kg  |
| PALB2    | 0.39546431   | 0.0412 | Olaparib 100mg/kg |
| PALB2    | 0.261279557  | 0.1486 | Olaparib 50mg/kg  |
| PAPPA2   | 0.156408363  | 0.4359 | Olaparib 100mg/kg |
| PAPPA2   | 0.118811959  | 0.5172 | Olaparib 50mg/kg  |
| PARP1    | 0.348434157  | 0.0749 | Olaparib 100mg/kg |
| PARP1    | 0.054400748  | 0.7674 | Olaparib 50mg/kg  |
| PAX5     | 0.196439519  | 0.3261 | Olaparib 100mg/kg |
| PAX5     | 0.227676121  | 0.2101 | Olaparib 50mg/kg  |
| PAX8     | 0.153306247  | 0.4452 | Olaparib 100mg/kg |
| PAX8     | 0.176460224  | 0.3340 | Olaparib 50mg/kg  |
| PBK      | 0.463575625  | 0.0149 | Olaparib 100mg/kg |
| PBK      | 0.370247491  | 0.0370 | Olaparib 50mg/kg  |
| PBLD     | 0.23318209   | 0.2418 | Olaparib 100mg/kg |
| PBLD     | 0.217611407  | 0.2315 | Olaparib 50mg/kg  |
| PBRM1    | 0.375920232  | 0.0533 | Olaparib 100mg/kg |
| PBRM1    | 0.28391025   | 0.1153 | Olaparib 50mg/kg  |
| PCNA     | 0.064563194  | 0.7490 | Olaparib 100mg/kg |
| PCNA     | 0.052713335  | 0.7745 | Olaparib 50mg/kg  |
| PDCD1LG2 | 0.058247036  | 0.7729 | Olaparib 100mg/kg |
| PDCD1LG2 | -0.06641767  | 0.7180 | Olaparib 50mg/kg  |
| PDCD4    | 0.175566472  | 0.3811 | Olaparib 100mg/kg |

|          |              |        |                   |
|----------|--------------|--------|-------------------|
| PDCD4    | 0.172975253  | 0.3438 | Olaparib 50mg/kg  |
| PDGFB    | -0.08563625  | 0.6711 | Olaparib 100mg/kg |
| PDGFB    | -0.033790312 | 0.8543 | Olaparib 50mg/kg  |
| PDGFRA   | -0.003114249 | 0.9877 | Olaparib 100mg/kg |
| PDGFRA   | 0.043976352  | 0.8111 | Olaparib 50mg/kg  |
| PDGFRB   | 0.055949331  | 0.7816 | Olaparib 100mg/kg |
| PDGFRB   | 0.048300969  | 0.7929 | Olaparib 50mg/kg  |
| PGR      | -0.014469659 | 0.9429 | Olaparib 100mg/kg |
| PGR      | -0.134347021 | 0.4635 | Olaparib 50mg/kg  |
| PIK3CA   | 0.239724912  | 0.2284 | Olaparib 100mg/kg |
| PIK3CA   | 0.145776851  | 0.4260 | Olaparib 50mg/kg  |
| PIK3R1   | 0.276387608  | 0.1628 | Olaparib 100mg/kg |
| PIK3R1   | 0.216869486  | 0.2332 | Olaparib 50mg/kg  |
| PIM1     | 0.079344426  | 0.6940 | Olaparib 100mg/kg |
| PIM1     | 0.093217482  | 0.6118 | Olaparib 50mg/kg  |
| PLCG2    | 0.17052469   | 0.3951 | Olaparib 100mg/kg |
| PLCG2    | 0.140485915  | 0.4431 | Olaparib 50mg/kg  |
| PLK1     | 0.31589131   | 0.1085 | Olaparib 100mg/kg |
| PLK1     | 0.211491967  | 0.2452 | Olaparib 50mg/kg  |
| PML      | -0.006447297 | 0.9745 | Olaparib 100mg/kg |
| PML      | -0.104965166 | 0.5675 | Olaparib 50mg/kg  |
| PMS2     | 0.331932585  | 0.0907 | Olaparib 100mg/kg |
| PMS2     | 0.239215338  | 0.1873 | Olaparib 50mg/kg  |
| POLD1    | 0.221113686  | 0.2677 | Olaparib 100mg/kg |
| POLD1    | 0.211316234  | 0.2456 | Olaparib 50mg/kg  |
| POLE     | 0.429783342  | 0.0253 | Olaparib 100mg/kg |
| POLE     | 0.256283873  | 0.1568 | Olaparib 50mg/kg  |
| POLE4    | 0.160096502  | 0.4251 | Olaparib 100mg/kg |
| POLE4    | 0.167893842  | 0.3584 | Olaparib 50mg/kg  |
| POT1     | 0.415741244  | 0.0310 | Olaparib 100mg/kg |
| POT1     | 0.315545118  | 0.0785 | Olaparib 50mg/kg  |
| POU5F1   | 0.376625838  | 0.0528 | Olaparib 100mg/kg |
| POU5F1   | 0.327648842  | 0.0672 | Olaparib 50mg/kg  |
| PPP1R15A | 0.124007529  | 0.5377 | Olaparib 100mg/kg |

|          |              |        |                   |
|----------|--------------|--------|-------------------|
| PPP1R15A | 0.078265429  | 0.6703 | Olaparib 50mg/kg  |
| PRDM1    | 0.223991248  | 0.2614 | Olaparib 100mg/kg |
| PRDM1    | 0.184861374  | 0.3111 | Olaparib 50mg/kg  |
| PREX2    | 0.306481596  | 0.1200 | Olaparib 100mg/kg |
| PREX2    | 0.035090715  | 0.8488 | Olaparib 50mg/kg  |
| PRKAA2   | -0.213402953 | 0.2852 | Olaparib 100mg/kg |
| PRKAA2   | -0.222614278 | 0.2207 | Olaparib 50mg/kg  |
| PRKACA   | 0.284608052  | 0.1502 | Olaparib 100mg/kg |
| PRKACA   | 0.20983567   | 0.2490 | Olaparib 50mg/kg  |
| PRKAR1A  | 0.167056634  | 0.4049 | Olaparib 100mg/kg |
| PRKAR1A  | -0.043480161 | 0.8132 | Olaparib 50mg/kg  |
| PRKCB    | 0.219768627  | 0.2707 | Olaparib 100mg/kg |
| PRKCB    | 0.217163945  | 0.2325 | Olaparib 50mg/kg  |
| PROM1    | 0.087563372  | 0.6641 | Olaparib 100mg/kg |
| PROM1    | -0.091939812 | 0.6168 | Olaparib 50mg/kg  |
| PRPS1    | 0.078667991  | 0.6965 | Olaparib 100mg/kg |
| PRPS1    | 0.097935483  | 0.5939 | Olaparib 50mg/kg  |
| PSMB8    | -0.115052271 | 0.5677 | Olaparib 100mg/kg |
| PSMB8    | -0.181463216 | 0.3202 | Olaparib 50mg/kg  |
| PSMD4    | 0.243677408  | 0.2206 | Olaparib 100mg/kg |
| PSMD4    | 0.11302042   | 0.5380 | Olaparib 50mg/kg  |
| PTCH1    | 0.016684396  | 0.9342 | Olaparib 100mg/kg |
| PTCH1    | -0.014571081 | 0.9369 | Olaparib 50mg/kg  |
| PTEN     | -0.163806928 | 0.4143 | Olaparib 100mg/kg |
| PTEN     | -0.265356847 | 0.1422 | Olaparib 50mg/kg  |
| PTGS2    | -0.145195668 | 0.4699 | Olaparib 100mg/kg |
| PTGS2    | -0.082227697 | 0.6546 | Olaparib 50mg/kg  |
| PTK2B    | -0.074003826 | 0.7137 | Olaparib 100mg/kg |
| PTK2B    | 0.019978428  | 0.9136 | Olaparib 50mg/kg  |
| PTP4A3   | -0.214501236 | 0.2826 | Olaparib 100mg/kg |
| PTP4A3   | -0.118135567 | 0.5196 | Olaparib 50mg/kg  |
| PTPN11   | 0.563940488  | 0.0022 | Olaparib 100mg/kg |
| PTPN11   | 0.365388882  | 0.0397 | Olaparib 50mg/kg  |
| PTPN12   | 0.264456492  | 0.1825 | Olaparib 100mg/kg |

|        |              |        |                   |
|--------|--------------|--------|-------------------|
| PTPN12 | 0.285563393  | 0.1131 | Olaparib 50mg/kg  |
| PTPN6  | 0.329846655  | 0.0929 | Olaparib 100mg/kg |
| PTPN6  | 0.155409492  | 0.3957 | Olaparib 50mg/kg  |
| PTPRB  | -0.017920331 | 0.9293 | Olaparib 100mg/kg |
| PTPRB  | -0.040953764 | 0.8239 | Olaparib 50mg/kg  |
| PTPRD  | -0.223646121 | 0.2621 | Olaparib 100mg/kg |
| PTPRD  | -0.185618828 | 0.3091 | Olaparib 50mg/kg  |
| PTPRF  | 0.196816003  | 0.3251 | Olaparib 100mg/kg |
| PTPRF  | 0.114650326  | 0.5321 | Olaparib 50mg/kg  |
| PTPRT  | -0.258249639 | 0.1934 | Olaparib 100mg/kg |
| PTPRT  | -0.175349579 | 0.3371 | Olaparib 50mg/kg  |
| PTTG1  | 0.274190935  | 0.1664 | Olaparib 100mg/kg |
| PTTG1  | 0.192505084  | 0.2912 | Olaparib 50mg/kg  |
| PXDNL  | -0.137882768 | 0.4928 | Olaparib 100mg/kg |
| PXDNL  | -0.305822448 | 0.0887 | Olaparib 50mg/kg  |
| RABL3  | 0.447221618  | 0.0193 | Olaparib 100mg/kg |
| RABL3  | 0.365067726  | 0.0399 | Olaparib 50mg/kg  |
| RAC1   | 0.099033366  | 0.6231 | Olaparib 100mg/kg |
| RAC1   | 0.051715274  | 0.7786 | Olaparib 50mg/kg  |
| RAD23B | 0.193919809  | 0.3324 | Olaparib 100mg/kg |
| RAD23B | 0.148398386  | 0.4176 | Olaparib 50mg/kg  |
| RAD50  | 0.415478877  | 0.0311 | Olaparib 100mg/kg |
| RAD50  | 0.431815761  | 0.0136 | Olaparib 50mg/kg  |
| RAD51D | 0.13873865   | 0.4901 | Olaparib 100mg/kg |
| RAD51D | 0.214472466  | 0.2385 | Olaparib 50mg/kg  |
| RAF1   | 0.234050819  | 0.2400 | Olaparib 100mg/kg |
| RAF1   | 0.018876977  | 0.9183 | Olaparib 50mg/kg  |
| RASA1  | 0.323950152  | 0.0993 | Olaparib 100mg/kg |
| RASA1  | 0.268213065  | 0.1377 | Olaparib 50mg/kg  |
| RB1    | 0.37595315   | 0.0533 | Olaparib 100mg/kg |
| RB1    | 0.172295412  | 0.3457 | Olaparib 50mg/kg  |
| RBM15  | 0.342833392  | 0.0800 | Olaparib 100mg/kg |
| RBM15  | 0.393707566  | 0.0258 | Olaparib 50mg/kg  |
| RCSD1  | 0.194910896  | 0.3299 | Olaparib 100mg/kg |

|        |              |        |                   |
|--------|--------------|--------|-------------------|
| RCSD1  | 0.089816038  | 0.6249 | Olaparib 50mg/kg  |
| REL    | 0.345051545  | 0.0780 | Olaparib 100mg/kg |
| REL    | 0.448054731  | 0.0101 | Olaparib 50mg/kg  |
| RELA   | 0.165696619  | 0.4088 | Olaparib 100mg/kg |
| RELA   | -0.034158991 | 0.8528 | Olaparib 50mg/kg  |
| RET    | 0.217077393  | 0.2768 | Olaparib 100mg/kg |
| RET    | 0.222749541  | 0.2204 | Olaparib 50mg/kg  |
| RHEB   | 0.212477533  | 0.2873 | Olaparib 100mg/kg |
| RHEB   | 0.060993719  | 0.7402 | Olaparib 50mg/kg  |
| RHOA   | 0.355260576  | 0.0690 | Olaparib 100mg/kg |
| RHOA   | 0.304706704  | 0.0899 | Olaparib 50mg/kg  |
| RICTOR | 0.207545816  | 0.2989 | Olaparib 100mg/kg |
| RICTOR | 0.134715584  | 0.4623 | Olaparib 50mg/kg  |
| RIT1   | 0.124817785  | 0.5350 | Olaparib 100mg/kg |
| RIT1   | 0.046995343  | 0.7984 | Olaparib 50mg/kg  |
| ROBO4  | -0.159715151 | 0.4262 | Olaparib 100mg/kg |
| ROBO4  | -0.201604735 | 0.2685 | Olaparib 50mg/kg  |
| ROS1   | 0.029182858  | 0.8851 | Olaparib 100mg/kg |
| ROS1   | -0.027519594 | 0.8812 | Olaparib 50mg/kg  |
| RPS6   | -0.084613248 | 0.6748 | Olaparib 100mg/kg |
| RPS6   | -0.113317517 | 0.5369 | Olaparib 50mg/kg  |
| RRM1   | 0.340968781  | 0.0818 | Olaparib 100mg/kg |
| RRM1   | 0.224378862  | 0.2170 | Olaparib 50mg/kg  |
| RRM2   | -0.024205166 | 0.9046 | Olaparib 100mg/kg |
| RRM2   | 0.052083751  | 0.7771 | Olaparib 50mg/kg  |
| RSF1   | 0.238548858  | 0.2308 | Olaparib 100mg/kg |
| RSF1   | 0.170623459  | 0.3505 | Olaparib 50mg/kg  |
| RUNX1  | 0.216695625  | 0.2776 | Olaparib 100mg/kg |
| RUNX1  | 0.241683484  | 0.1827 | Olaparib 50mg/kg  |
| SCN8A  | -0.236671667 | 0.2346 | Olaparib 100mg/kg |
| SCN8A  | -0.131286857 | 0.4738 | Olaparib 50mg/kg  |
| SDHA   | 0.404356029  | 0.0364 | Olaparib 100mg/kg |
| SDHA   | 0.228501693  | 0.2084 | Olaparib 50mg/kg  |
| SDHB   | 0.188779237  | 0.3457 | Olaparib 100mg/kg |



|         |              |        |                   |
|---------|--------------|--------|-------------------|
| SDHB    | 0.026182575  | 0.8869 | Olaparib 50mg/kg  |
| SETBP1  | -0.049407768 | 0.8067 | Olaparib 100mg/kg |
| SETBP1  | -0.119572976 | 0.5145 | Olaparib 50mg/kg  |
| SF3B1   | 0.31387192   | 0.1109 | Olaparib 100mg/kg |
| SF3B1   | 0.120283042  | 0.5120 | Olaparib 50mg/kg  |
| SGK1    | 0.309240986  | 0.1165 | Olaparib 100mg/kg |
| SGK1    | 0.269908239  | 0.1352 | Olaparib 50mg/kg  |
| SH2B3   | 0.281897618  | 0.1543 | Olaparib 100mg/kg |
| SH2B3   | 0.217199633  | 0.2324 | Olaparib 50mg/kg  |
| SIRT1   | 0.370664487  | 0.0570 | Olaparib 100mg/kg |
| SIRT1   | 0.310137528  | 0.0841 | Olaparib 50mg/kg  |
| SLCO1B1 | 0.145244916  | 0.4698 | Olaparib 100mg/kg |
| SLCO1B1 | 0.063910099  | 0.7282 | Olaparib 50mg/kg  |
| SLFN11  | -0.077034156 | 0.7025 | Olaparib 100mg/kg |
| SLFN11  | 0.082908707  | 0.6519 | Olaparib 50mg/kg  |
| SMAD4   | 0.379498416  | 0.0509 | Olaparib 100mg/kg |
| SMAD4   | 0.302664504  | 0.0922 | Olaparib 50mg/kg  |
| SMARCA4 | 0.26996792   | 0.1732 | Olaparib 100mg/kg |
| SMARCA4 | 0.19701375   | 0.2798 | Olaparib 50mg/kg  |
| SMARCB1 | 0.169176434  | 0.3989 | Olaparib 100mg/kg |
| SMARCB1 | 0.139775028  | 0.4455 | Olaparib 50mg/kg  |
| SMO     | 0.238941131  | 0.2300 | Olaparib 100mg/kg |
| SMO     | -0.040959265 | 0.8239 | Olaparib 50mg/kg  |
| SOX10   | 0.030039355  | 0.8818 | Olaparib 100mg/kg |
| SOX10   | -0.093581896 | 0.6104 | Olaparib 50mg/kg  |
| SPHK1   | 0.108528865  | 0.5900 | Olaparib 100mg/kg |
| SPHK1   | -0.119003528 | 0.5165 | Olaparib 50mg/kg  |
| SPRY2   | 0.31423876   | 0.1104 | Olaparib 100mg/kg |
| SPRY2   | 0.210895744  | 0.2466 | Olaparib 50mg/kg  |
| SRSF2   | 0.521425894  | 0.0053 | Olaparib 100mg/kg |
| SRSF2   | 0.296475035  | 0.0994 | Olaparib 50mg/kg  |
| SSX1    | -0.298305456 | 0.1307 | Olaparib 100mg/kg |
| SSX1    | -0.013627963 | 0.9410 | Olaparib 50mg/kg  |
| SSX2    | 0.172573104  | 0.3894 | Olaparib 100mg/kg |

|         |              |        |                   |
|---------|--------------|--------|-------------------|
| SSX2    | 0.11090587   | 0.5457 | Olaparib 50mg/kg  |
| SSX4    | -0.206389578 | 0.3017 | Olaparib 100mg/kg |
| SSX4    | -0.251033011 | 0.1658 | Olaparib 50mg/kg  |
| STAG2   | 0.386847606  | 0.0462 | Olaparib 100mg/kg |
| STAG2   | 0.31357889   | 0.0805 | Olaparib 50mg/kg  |
| STAG3   | 0.361541062  | 0.0639 | Olaparib 100mg/kg |
| STAG3   | 0.363952271  | 0.0406 | Olaparib 50mg/kg  |
| STAT1   | -0.171400644 | 0.3926 | Olaparib 100mg/kg |
| STAT1   | -0.265302497 | 0.1422 | Olaparib 50mg/kg  |
| STAT3   | 0.268321984  | 0.1760 | Olaparib 100mg/kg |
| STAT3   | 0.083754864  | 0.6486 | Olaparib 50mg/kg  |
| STAT5B  | 0.113697979  | 0.5723 | Olaparib 100mg/kg |
| STAT5B  | 0.050046762  | 0.7856 | Olaparib 50mg/kg  |
| STAT6   | -0.088570286 | 0.6604 | Olaparib 100mg/kg |
| STAT6   | -0.180558656 | 0.3227 | Olaparib 50mg/kg  |
| STK11   | -0.023304599 | 0.9081 | Olaparib 100mg/kg |
| STK11   | 0.050673625  | 0.7830 | Olaparib 50mg/kg  |
| STMN1   | 0.103651469  | 0.6069 | Olaparib 100mg/kg |
| STMN1   | 0.147641079  | 0.4200 | Olaparib 50mg/kg  |
| SUFU    | 0.224041328  | 0.2613 | Olaparib 100mg/kg |
| SUFU    | 0.092064898  | 0.6163 | Olaparib 50mg/kg  |
| SULT1E1 | 0.111530637  | 0.5797 | Olaparib 100mg/kg |
| SULT1E1 | 0.207941688  | 0.2534 | Olaparib 50mg/kg  |
| SYK     | -0.011097207 | 0.9562 | Olaparib 100mg/kg |
| SYK     | 0.073231825  | 0.6904 | Olaparib 50mg/kg  |
| TACSTD2 | 0.116174748  | 0.5639 | Olaparib 100mg/kg |
| TACSTD2 | 0.045813673  | 0.8034 | Olaparib 50mg/kg  |
| TBK1    | 0.319380338  | 0.1044 | Olaparib 100mg/kg |
| TBK1    | 0.147052526  | 0.4219 | Olaparib 50mg/kg  |
| TEK     | -0.001486847 | 0.9941 | Olaparib 100mg/kg |
| TEK     | 0.068624342  | 0.7090 | Olaparib 50mg/kg  |
| TERT    | 0.435590399  | 0.0231 | Olaparib 100mg/kg |
| TERT    | 0.265558248  | 0.1418 | Olaparib 50mg/kg  |
| TET2    | 0.191443309  | 0.3388 | Olaparib 100mg/kg |

|         |              |        |                   |
|---------|--------------|--------|-------------------|
| TET2    | 0.241548662  | 0.1829 | Olaparib 50mg/kg  |
| TFF3    | -0.201348161 | 0.3139 | Olaparib 100mg/kg |
| TFF3    | -0.227322742 | 0.2109 | Olaparib 50mg/kg  |
| TGFA    | 0.12813173   | 0.5242 | Olaparib 100mg/kg |
| TGFA    | 0.059265228  | 0.7473 | Olaparib 50mg/kg  |
| TGFBR3  | -0.036990896 | 0.8547 | Olaparib 100mg/kg |
| TGFBR3  | -0.150754965 | 0.4102 | Olaparib 50mg/kg  |
| THBS2   | -0.149642312 | 0.4563 | Olaparib 100mg/kg |
| THBS2   | -0.212485693 | 0.2430 | Olaparib 50mg/kg  |
| TIMP1   | 0.20670028   | 0.3009 | Olaparib 100mg/kg |
| TIMP1   | 0.161409444  | 0.3775 | Olaparib 50mg/kg  |
| TLK2    | 0.176359438  | 0.3789 | Olaparib 100mg/kg |
| TLK2    | 0.051757554  | 0.7785 | Olaparib 50mg/kg  |
| TLX3    | 0.079962155  | 0.6918 | Olaparib 100mg/kg |
| TLX3    | 0.147653549  | 0.4200 | Olaparib 50mg/kg  |
| TMPRSS2 | 0.171225148  | 0.3931 | Olaparib 100mg/kg |
| TMPRSS2 | 0.01162659   | 0.9496 | Olaparib 50mg/kg  |
| TOP1    | 0.388085917  | 0.0455 | Olaparib 100mg/kg |
| TOP1    | 0.42583444   | 0.0151 | Olaparib 50mg/kg  |
| TOP2A   | 0.356576677  | 0.0679 | Olaparib 100mg/kg |
| TOP2A   | 0.331426641  | 0.0639 | Olaparib 50mg/kg  |
| TP53    | 0.306753402  | 0.1196 | Olaparib 100mg/kg |
| TP53    | 0.053646243  | 0.7706 | Olaparib 50mg/kg  |
| TP53BP1 | 0.330725514  | 0.0920 | Olaparib 100mg/kg |
| TP53BP1 | 0.024862169  | 0.8926 | Olaparib 50mg/kg  |
| TPT1    | 0.216985122  | 0.2770 | Olaparib 100mg/kg |
| TPT1    | 0.177179934  | 0.3320 | Olaparib 50mg/kg  |
| TSC1    | 0.32607878   | 0.0969 | Olaparib 100mg/kg |
| TSC1    | 0.147371653  | 0.4209 | Olaparib 50mg/kg  |
| TSC2    | 0.00849241   | 0.9665 | Olaparib 100mg/kg |
| TSC2    | -0.024087813 | 0.8959 | Olaparib 50mg/kg  |
| TSPYL1  | 0.127934156  | 0.5248 | Olaparib 100mg/kg |
| TSPYL1  | 0.055308428  | 0.7637 | Olaparib 50mg/kg  |
| TTF1    | 0.238343984  | 0.2312 | Olaparib 100mg/kg |

|           |              |        |                   |
|-----------|--------------|--------|-------------------|
| TTF1      | 0.098384483  | 0.5922 | Olaparib 50mg/kg  |
| TYMS      | 0.21764867   | 0.2755 | Olaparib 100mg/kg |
| TYMS      | 0.159787675  | 0.3824 | Olaparib 50mg/kg  |
| U2AF1     | 0.054140236  | 0.7885 | Olaparib 100mg/kg |
| U2AF1     | -0.056708514 | 0.7579 | Olaparib 50mg/kg  |
| VEGFA     | -0.046099235 | 0.8194 | Olaparib 100mg/kg |
| VEGFA     | 0.027846548  | 0.8798 | Olaparib 50mg/kg  |
| VEGFC     | 0.22010795   | 0.2699 | Olaparib 100mg/kg |
| VEGFC     | 0.102603283  | 0.5763 | Olaparib 50mg/kg  |
| VHL       | 0.198474571  | 0.3210 | Olaparib 100mg/kg |
| VHL       | -0.003997194 | 0.9827 | Olaparib 50mg/kg  |
| VPS37A    | 0.157665258  | 0.4322 | Olaparib 100mg/kg |
| VPS37A    | 0.310337006  | 0.0839 | Olaparib 50mg/kg  |
| WDR12     | 0.366697335  | 0.0599 | Olaparib 100mg/kg |
| WDR12     | 0.097796177  | 0.5944 | Olaparib 50mg/kg  |
| WEE1      | 0.589730119  | 0.0012 | Olaparib 100mg/kg |
| WEE1      | 0.479899559  | 0.0054 | Olaparib 50mg/kg  |
| WNT11     | -0.161467351 | 0.4210 | Olaparib 100mg/kg |
| WNT11     | -0.1444012   | 0.4304 | Olaparib 50mg/kg  |
| WT1       | -0.080527476 | 0.6897 | Olaparib 100mg/kg |
| WT1       | 0.130420306  | 0.4768 | Olaparib 50mg/kg  |
| WWTR1     | 0.183843117  | 0.3587 | Olaparib 100mg/kg |
| WWTR1     | 0.007001557  | 0.9697 | Olaparib 50mg/kg  |
| XRCC1     | 0.222966368  | 0.2636 | Olaparib 100mg/kg |
| XRCC1     | 0.145415594  | 0.4271 | Olaparib 50mg/kg  |
| YAP1      | 0.160490939  | 0.4239 | Olaparib 100mg/kg |
| YAP1      | 0.117412055  | 0.5222 | Olaparib 50mg/kg  |
| ZEB1      | 0.001324221  | 0.9948 | Olaparib 100mg/kg |
| ZEB1      | 0.040239325  | 0.8269 | Olaparib 50mg/kg  |
| ZRSR2     | 0.186078205  | 0.3527 | Olaparib 100mg/kg |
| ZRSR2A751 | 0.071381     | 0.6979 | Olaparib 50mg/kg  |

**Supplementary Table 7.** Biomarker correlations. Pearson's linear correlation of resistance fraction and mRNA expression for all CIViC genes and both olaparib 100 and 50 mg/kg.

| Gene   | Group   | p-value  | Hazard ratio | Cox coefficients | Category                                 |
|--------|---------|----------|--------------|------------------|------------------------------------------|
| ABL2   | Treated | 2.35E-08 | 0.5334       | -0.6284          | Differentiates both groups               |
| ARID2  | Treated | 0.660768 | 0.9529       | -0.0482          | No differential survival in either group |
| ASNS   | Treated | 1.02E-09 | 0.5022       | -0.6888          | Differentiates both groups               |
| ATR    | Treated | 6.91E-08 | 0.5505       | -0.5969          | Differentiates both groups               |
| AURKA  | Treated | 0.564024 | 1.0705       | 0.0681           | Differntiates only untreated             |
| BCL2   | Treated | 0.003405 | 0.7160       | -0.3341          | Differntiates only treated               |
| BIRC5  | Treated | 7.32E-05 | 0.6318       | -0.4592          | Differntiates only treated               |
| BRCA1  | Treated | 0.559291 | 1.0619       | 0.0601           | No differential survival in either group |
| BRCA2  | Treated | 8.84E-12 | 0.4680       | -0.7592          | Differentiates both groups               |
| CDK6   | Treated | 2.23E-06 | 0.5929       | -0.5228          | Differentiates both groups               |
| CHEK1  | Treated | 0.009418 | 0.7481       | -0.2903          | Differntiates only treated               |
| CHEK2  | Treated | 6.20E-06 | 0.5992       | -0.5121          | Differentiates both groups               |
| DEK    | Treated | 0.003379 | 1.3835       | 0.3246           | Differntiates only treated               |
| DNMT1  | Treated | 0.147924 | 0.8502       | -0.1623          | No differential survival in either group |
| ERCC5  | Treated | 0.002606 | 0.7134       | -0.3377          | Differentiates both groups               |
| FUBP1  | Treated | 0.144772 | 1.1748       | 0.1611           | No differential survival in either group |
| KIF23  | Treated | 4.43E-11 | 0.4686       | -0.7580          | Differentiates both groups               |
| LEPR   | Treated | 6.13E-08 | 0.5483       | -0.6009          | Differntiates only treated               |
| NBN    | Treated | 3.92E-10 | 0.4957       | -0.7017          | Differentiates both groups               |
| NCOA2  | Treated | 2.03E-06 | 0.5882       | -0.5306          | Differntiates only treated               |
| NFE2L2 | Treated | 1.34E-09 | 0.5068       | -0.6796          | Differentiates both groups               |
| NUDT15 | Treated | 5.38E-08 | 0.5444       | -0.6080          | Differntiates only treated               |
| NUP98  | Treated | 1.37E-10 | 0.4925       | -0.7083          | Differentiates both groups               |
| PALB2  | Treated | 0.020366 | 0.7755       | -0.2542          | Differentiates both groups               |
| PBK    | Treated | 4.26E-06 | 0.6019       | -0.5077          | Differentiates both groups               |
| POLE   | Treated | 0.000421 | 0.6721       | -0.3974          | Differntiates only treated               |
| POT1   | Treated | 0.000173 | 0.6533       | -0.4257          | Differntiates only treated               |
| PTPN11 | Treated | 1.77E-20 | 0.3501       | -1.0496          | Differentiates both groups               |
| RABL3  | Treated | 1.23E-19 | 0.3340       | -1.0966          | Differentiates both groups               |
| RAD50  | Treated | 0.315322 | 1.1201       | 0.1134           | No differential survival in either group |
| SDHA   | Treated | 9.55E-06 | 0.6115       | -0.4919          | Differntiates only treated               |
| SRSF2  | Treated | 3.47E-07 | 0.5592       | -0.5813          | Differntiates only treated               |
| STAG2  | Treated | 0.002059 | 0.7045       | -0.3503          | Differentiates both groups               |

|        |           |          |        |         |                                          |
|--------|-----------|----------|--------|---------|------------------------------------------|
| TERT   | Treated   | 1.58E-18 | 0.3455 | -1.0627 | Differentiates both groups               |
| TOP1   | Treated   | 1.08E-09 | 0.5025 | -0.6881 | Differentiates both groups               |
| WEE1   | Treated   | 6.08E-13 | 0.4381 | -0.8254 | Differentiates both groups               |
| ABL2   | Untreated | 1.91E-07 | 0.6362 | -0.4522 | Differentiates both groups               |
| ARID2  | Untreated | 0.100905 | 1.1656 | 0.1532  | No differential survival in either group |
| ASNS   | Untreated | 0.013953 | 0.8077 | -0.2135 | Differentiates both groups               |
| ATR    | Untreated | 3.38E-05 | 0.7053 | -0.3492 | Differentiates both groups               |
| AURKA  | Untreated | 2.30E-05 | 0.6652 | -0.4076 | Differntiates only untreated             |
| BCL2   | Untreated | 0.681582 | 0.9706 | -0.0299 | Differntiates only treated               |
| BIRC5  | Untreated | 0.787267 | 0.9715 | -0.0289 | Differntiates only treated               |
| BRCA1  | Untreated | 0.682278 | 1.0348 | 0.0342  | No differential survival in either group |
| BRCA2  | Untreated | 1.93E-14 | 0.4965 | -0.7001 | Differentiates both groups               |
| CDK6   | Untreated | 7.98E-16 | 0.4829 | -0.7280 | Differentiates both groups               |
| CHEK1  | Untreated | 0.052993 | 0.8473 | -0.1657 | Differntiates only treated               |
| CHEK2  | Untreated | 4.48E-12 | 0.5123 | -0.6688 | Differentiates both groups               |
| DEK    | Untreated | 0.071134 | 0.8553 | -0.1563 | Differntiates only treated               |
| DNMT1  | Untreated | 0.107037 | 1.1674 | 0.1548  | No differential survival in either group |
| ERCC5  | Untreated | 0.034476 | 0.8443 | -0.1693 | Differentiates both groups               |
| FUBP1  | Untreated | 0.660861 | 1.0424 | 0.0415  | No differential survival in either group |
| KIF23  | Untreated | 2.01E-08 | 0.6099 | -0.4944 | Differentiates both groups               |
| LEPR   | Untreated | 0.301223 | 0.9155 | -0.0883 | Differntiates only treated               |
| NBN    | Untreated | 0.015769 | 0.8194 | -0.1991 | Differentiates both groups               |
| NCOA2  | Untreated | 0.517213 | 1.0621 | 0.0602  | Differntiates only treated               |
| NFE2L2 | Untreated | 6.03E-16 | 0.4737 | -0.7472 | Differentiates both groups               |
| NUDT15 | Untreated | 0.177112 | 0.8817 | -0.1259 | Differntiates only treated               |
| NUP98  | Untreated | 3.74E-08 | 0.6197 | -0.4785 | Differentiates both groups               |
| PALB2  | Untreated | 4.62E-07 | 0.6516 | -0.4283 | Differentiates both groups               |
| PBK    | Untreated | 5.23E-05 | 0.7010 | -0.3553 | Differentiates both groups               |
| POLE   | Untreated | 0.145525 | 0.8867 | -0.1202 | Differntiates only treated               |
| POT1   | Untreated | 0.13855  | 0.8747 | -0.1339 | Differntiates only treated               |
| PTPN11 | Untreated | 1.80E-06 | 0.6664 | -0.4059 | Differentiates both groups               |
| RABL3  | Untreated | 3.12E-06 | 0.6638 | -0.4098 | Differentiates both groups               |
| RAD50  | Untreated | 0.409256 | 0.9172 | -0.0865 | No differential survival in either group |
| SDHA   | Untreated | 0.062964 | 1.1841 | 0.1690  | Differntiates only treated               |

|       |           |          |        |         |                            |
|-------|-----------|----------|--------|---------|----------------------------|
| SRSF2 | Untreated | 0.511889 | 1.0723 | 0.0698  | Differntiates only treated |
| STAG2 | Untreated | 0.005405 | 0.7656 | -0.2671 | Differentiates both groups |
| TERT  | Untreated | 1.63E-14 | 0.4939 | -0.7054 | Differentiates both groups |
| TOP1  | Untreated | 0.000118 | 0.7164 | -0.3335 | Differentiates both groups |
| WEE1  | Untreated | 3.97E-13 | 0.5104 | -0.6725 | Differentiates both groups |

**Supplementary Table 8.** Survival analysis. Kaplan-Meier survival analysis for 100 mg/kg olaparib treatment and untreated groups only. P-value and hazard ratio is compared between treated and untreated groups to determine if a gene shows differential survival in both, either or neither group (category).

| Gene   | OncoKB Assessment |                  |                  |                  |           | Literature Evidence |                                                                                                                  |                                                                                                                                                                                         |
|--------|-------------------|------------------|------------------|------------------|-----------|---------------------|------------------------------------------------------------------------------------------------------------------|-----------------------------------------------------------------------------------------------------------------------------------------------------------------------------------------|
|        | Therapeutic Level | Diagnostic Level | Prognostic Level | Resistance Level | FDA Level | Alterations         | Pub. Title                                                                                                       | Pub. Link                                                                                                                                                                               |
| ABL2   |                   | Dx1              | Px1              |                  |           | Likely oncogenic    | of breast cancer <i>in vivo</i>                                                                                  | <a href="https://www.nature.com/articles/onc2012284">https://www.nature.com/articles/onc2012284</a>                                                                                     |
| ARID2  |                   |                  |                  |                  |           | Likely oncogenic    | Relapse                                                                                                          | <a href="https://doi.org/10.3389/fonc.2022.880643">S1535610817302970?via%3Dihub</a>                                                                                                     |
| ASNS   |                   |                  |                  |                  |           |                     | Cellular Response to Olaparib Treatment                                                                          | <a href="https://www.mdpi.com/2072-6694/14/15/3661">https://www.mdpi.com/2072-6694/14/15/3661</a>                                                                                       |
| ATR    |                   |                  |                  |                  |           | Likely oncogenic    | resistance to olaparib and dysregulates DNA damage response protein expression in <i>BRCA2</i> MUTovarian cancer | <a href="https://www.nature.com/articles/s41598-023-50151-y">https://www.nature.com/articles/s41598-023-50151-y</a>                                                                     |
| AURKA  |                   |                  |                  |                  |           | Oncogenic           | and poly(ADP-ribose) polymerase function in ovarian                                                              | <a href="https://www.oncotarget.com/article/18970/text/">https://www.oncotarget.com/article/18970/text/</a>                                                                             |
| BCL2   |                   | Dx2              |                  |                  |           | Oncogenic           | combinations with PARP inhibitors in ovarian cancer                                                              | <a href="https://doi.org/10.3389/fonc.2022.880643">PII52352-3964(20)30364-9/fulltext</a>                                                                                                |
| BIRC5  |                   |                  |                  |                  |           |                     | drug resistance in cancer therapy                                                                                | <a href="https://doi.org/10.3389/fonc.2022.880643">S0168365916302218</a>                                                                                                                |
| BRCA1  | 1                 |                  |                  |                  | 2         | Oncogenic           | Colorectal, Pancreatic, Non-Small Cell Lung and Prostate Cancers, and the Mechanisms of Resistance to PARP       | <a href="https://www.frontiersin.org/journals/oncology/articles/10.3389/fonc.2022.880643/full">https://www.frontiersin.org/journals/oncology/articles/10.3389/fonc.2022.880643/full</a> |
| BRCA2  | 1                 |                  |                  |                  | 2         | Oncogenic           | Colorectal, Pancreatic, Non-Small Cell Lung and Prostate Cancers, and the Mechanisms of Resistance to PARP       | <a href="https://www.frontiersin.org/journals/oncology/articles/10.3389/fonc.2022.880643/full">https://www.frontiersin.org/journals/oncology/articles/10.3389/fonc.2022.880643/full</a> |
| CDK6   |                   |                  |                  |                  |           | Oncogenic           | combinations                                                                                                     | <a href="https://doi.org/10.3389/fonc.2022.880643">02326-7</a>                                                                                                                          |
| CHEK1  | 1                 |                  |                  |                  | 2         | Likely oncogenic    | resistance to olaparib and dysregulates DNA damage response protein expression in <i>BRCA2</i> MUTovarian cancer | <a href="https://www.nature.com/articles/s41598-023-50151-y">https://www.nature.com/articles/s41598-023-50151-y</a>                                                                     |
| CHEK2  | 1                 |                  |                  |                  | 2         | Oncogenic           | combinations                                                                                                     | <a href="https://doi.org/10.3389/fonc.2022.880643">02326-7</a>                                                                                                                          |
| CTAG1B |                   |                  |                  |                  |           |                     | immunomodulatory and nano-therapeutic approaches                                                                 | <a href="https://doi.org/10.3389/fonc.2022.880643">S0168365922004631</a>                                                                                                                |
| DEK    |                   | Dx1              | Px1              |                  |           | Oncogenic           | Alternative Activation of Tumor Associated Macrophages                                                           | <a href="https://www.mdpi.com/2072-6694/12/7/1936">https://www.mdpi.com/2072-6694/12/7/1936</a>                                                                                         |
| DNMT1  |                   |                  |                  |                  |           |                     | resistance in cancers                                                                                            | <a href="https://doi.org/10.3389/fonc.2022.880643">01341-7</a>                                                                                                                          |
| ERCC5  |                   |                  |                  |                  |           |                     | Biomarkers of Response and Resistance to DNA Repair Targeted Therapies                                           | <a href="https://doi.org/10.3389/fonc.2022.880643">/5651/122919/Biomarkers-of-Response-and-Resistance-to-DNA</a>                                                                        |
| FUBP1  |                   |                  |                  |                  |           |                     | Widespread Regulator of Tumor Suppressor and Oncogene Alternative Splicing                                       | <a href="https://www.sciencedirect.com/science/article/pii/S2211124719311088?via%3Dihub">https://www.sciencedirect.com/science/article/pii/S2211124719311088?via%3Dihub</a>             |
| KIF23  |                   |                  |                  |                  |           |                     | at stressed replication forks                                                                                    | <a href="https://doi.org/10.3389/fonc.2022.880643">/6814461</a>                                                                                                                         |
| LEPR   |                   |                  |                  |                  |           |                     | Microenvironment Promotes Development of Triple                                                                  | <a href="https://www.mdpi.com/2072-6694/14/17/4139">https://www.mdpi.com/2072-6694/14/17/4139</a>                                                                                       |
| NBN    |                   |                  |                  |                  |           | Likely oncogenic    | overcoming strategies                                                                                            | <a href="https://doi.org/10.1016/j.gendis.2023.02.014">https://doi.org/10.1016/j.gendis.2023.02.014</a>                                                                                 |
| NCOA2  |                   |                  |                  |                  |           |                     | Cancer Cell Growth by Positively Regulating the                                                                  | <a href="https://doi.org/10.3389/fonc.2019.00164/full">cles/10.3389/fonc.2019.00164/full</a>                                                                                            |
| NCOA3  |                   |                  |                  |                  |           |                     | Cancer Cell Growth by Positively Regulating the                                                                  | <a href="https://doi.org/10.3389/fonc.2019.00164/full">cles/10.3389/fonc.2019.00164/full</a>                                                                                            |
| NFE2L2 |                   |                  |                  |                  |           | Oncogenic           | NFE2L2/NRF2 activation in breast cancer stem cell-like cells: Implications for cancer stem cell resistance       | <a href="https://www.sciencedirect.com/science/article/pii/S2213231718301460">https://www.sciencedirect.com/science/article/pii/S2213231718301460</a>                                   |
| NUDT15 |                   |                  |                  |                  |           |                     | Role of the NUDT Enzymes in Breast Cancer                                                                        | <a href="https://www.mdpi.com/1422-0067/22/5/2267">https://www.mdpi.com/1422-0067/22/5/2267</a>                                                                                         |
| NUP98  |                   |                  |                  |                  |           | Likely oncogenic    | interacting with PARP1 in ovarian cancer                                                                         | <a href="https://doi.org/10.3389/fonc.2022.880643">04670-7</a>                                                                                                                          |
| PALB2  | 1                 |                  |                  |                  | 2         | Likely oncogenic    | clinical implications                                                                                            | <a href="https://doi.org/10.3389/fonc.2022.880643">cancer.biomedcentral.com/articles/10.1186/s12943-022-0067-2</a>                                                                      |
| PBK    |                   |                  |                  |                  |           |                     | TRIM37/NFκB axis in ovarian cancer                                                                               | <a href="https://doi.org/10.3389/fonc.2022.880643">00809-w</a>                                                                                                                          |
| POLE   |                   |                  |                  |                  |           | Likely oncogenic    | Colorectal, Pancreatic, Non-Small Cell Lung and Prostate Cancers, and the Mechanisms of Resistance to PARP       | <a href="https://www.frontiersin.org/journals/oncology/articles/10.3389/fonc.2022.880643/full">https://www.frontiersin.org/journals/oncology/articles/10.3389/fonc.2022.880643/full</a> |
| POT1   |                   |                  |                  |                  |           | Likely oncogenic    | Cells                                                                                                            | <a href="https://doi.org/10.3389/fonc.2022.880643">S0962892419301242</a>                                                                                                                |
| PTPN11 |                   | Dx2              |                  |                  |           | Likely oncogenic    | Resistance to Targeted Cancer Drugs                                                                              | <a href="https://doi.org/10.3389/fonc.2022.880643">reports/pdfExtended/S2211-1247(15)00922-5</a>                                                                                        |
| RABL3  |                   |                  |                  |                  |           |                     | Inhibitor-Resistant Breast Cancer Cells                                                                          | <a href="https://www.mdpi.com/1422-0067/21/16/5841">https://www.mdpi.com/1422-0067/21/16/5841</a>                                                                                       |
| RAD50  |                   |                  |                  |                  |           | Likely oncogenic    | Mutated Breast Cancer and New Therapeutic Approaches                                                             | <a href="https://www.mdpi.com/2072-6694/15/14/3642">https://www.mdpi.com/2072-6694/15/14/3642</a>                                                                                       |
| RBM15  |                   | Dx1              |                  |                  |           | Oncogenic           | methylation in breast cancer                                                                                     | <a href="https://doi.org/10.3389/fonc.2022.880643">61983/</a>                                                                                                                           |
| REL    |                   |                  |                  |                  |           |                     | Antineoplastic Drugs                                                                                             | <a href="https://www.mdpi.com/1422-0067/18/10/2111">https://www.mdpi.com/1422-0067/18/10/2111</a>                                                                                       |
| SDHA   |                   |                  |                  |                  |           | Likely oncogenic    | Ability, and Cancer Stem Cell Properties through                                                                 | <a href="https://www.mdpi.com/1422-0067/23/21/12875">https://www.mdpi.com/1422-0067/23/21/12875</a>                                                                                     |
| SRSF2  | 4                 | Dx2              | Px1              |                  | 3         | Oncogenic           | Aberrant alternative splicing in breast cancer                                                                   | <a href="https://doi.org/10.3389/fonc.2022.880643">5486617</a>                                                                                                                          |
| STAG2  |                   | Dx2              |                  |                  |           | Likely oncogenic    | creates a targetable synthetic lethality in cohesin-mutant                                                       | <a href="https://doi.org/10.3389/fonc.2022.880643">09659-z</a>                                                                                                                          |
| STAG3  |                   |                  |                  |                  |           |                     | confers resistance to BRAF inhibition in melanoma.                                                               | <a href="https://www.nature.com/articles/nm.4155">https://www.nature.com/articles/nm.4155</a>                                                                                           |
| TERT   |                   |                  |                  |                  |           | Oncogenic           | transcriptase (TERT/hTERT) in breast cancer                                                                      | <a href="https://doi.org/10.3389/fonc.2022.880643">1186/s12964-023-01244-8</a>                                                                                                          |
| TOP1   |                   |                  |                  |                  |           | Likely oncogenic    | Determines the Efficacy of Subsequent Chemotherapy                                                               | <a href="https://www.mdpi.com/2072-6694/12/2/334">https://www.mdpi.com/2072-6694/12/2/334</a>                                                                                           |
| WEE1   |                   |                  |                  |                  |           |                     | immune response in BRCA1/2 wildtype triple-negative                                                              | <a href="https://doi.org/10.3389/fonc.2022.880643">00568-5</a>                                                                                                                          |

**Supplementary Table 9.** Independent validation of selected genes. The genes selected as significant using the correlation analysis have been checked against OncoKB annotations and published literature in the context of PARP inhibition. Each of the 5 levels of OncoKB are assigned a label. The lower the number the higher the evidence and confidence in a particular biomarker (i.e. therapeutic level 1 corresponds to "FDA-recognised biomarker predictive of response to an FDA-approved drug" whereas level 4 corresponds to "compelling biological evidence supports the biomarker as benign predictive").



| PDX     | Complete responder % | Initial responder % | Non-responder % | Final classification |
|---------|----------------------|---------------------|-----------------|----------------------|
| PDX060  | 0                    | 1                   | 99              | Non-responder        |
| PDX127  | 0                    | 92                  | 8               | Initial responder    |
| PDX156  | 0                    | 0                   | 100             | Non-responder        |
| STG316  | 0                    | 97                  | 3               | Initial responder    |
| PDX288  | 0                    | 2                   | 98              | Non-responder        |
| PDX094  | 0                    | 0                   | 100             | Non-responder        |
| PDX221  | 0                    | 0                   | 100             | Non-responder        |
| PDX124  | 0                    | 1                   | 99              | Non-responder        |
| PDX179  | 0                    | 0                   | 100             | Non-responder        |
| PDX230  | 99                   | 0                   | 1               | Completer responder  |
| PDX405T | 99                   | 0                   | 1               | Completer responder  |
| STG139  | 0                    | 0                   | 100             | Non-responder        |
| PDX549  | 0                    | 0                   | 100             | Non-responder        |
| PDX274  | 0                    | 1                   | 99              | Non-responder        |
| PDX102  | 0                    | 0                   | 100             | Non-responder        |
| PDX341  | 0                    | 95                  | 5               | Initial responder    |
| PDX302  | 99                   | 0                   | 1               | Completer responder  |
| PDX332  | 0                    | 98                  | 2               | Initial responder    |
| PDX252  | 0                    | 1                   | 99              | Non-responder        |
| PDX270  | 0                    | 1                   | 99              | Non-responder        |
| PDX236  | 0                    | 95                  | 5               | Initial responder    |
| PDX339  | 0                    | 1                   | 99              | Non-responder        |
| PDX291B | 0                    | 95                  | 5               | Initial responder    |
| PDX335  | 0                    | 1                   | 99              | Non-responder        |
| PDX432  | 0                    | 76                  | 24              | Initial responder    |
| PDX384  | 1                    | 98                  | 1               | Initial responder    |
| PDX377  | 99                   | 0                   | 1               | Completer responder  |

**Supplementary Table 10.** PDX classification. The final classification of each PDX is given by the consensus of the classifications of the mice that comprising each PDX. The percentages represent the portion of mice classified as complete, partial or non-responders in each PDX.
